# Supplementary material for: Cationic dialkylarylphosphates: a new family of bio-inspired cationic lipids for gene delivery
Source: Royal Society of Chemistry journal article supplement (doi:10.1039/c4ob01770f), 2014-11-11
Supplement: c4ob01770f1.pdf [file c4ob01770f1.pdf]

## **Cationic dialkylarylphosphate: new family of bio-inspired cationic lipids for gene delivery.**

Stéphanie S. Le Corre,<sup>a,c</sup> Nawal Belmadi,<sup>c</sup> Mathieu Berchel,<sup>a,c</sup> Tony Le Gall,<sup>b,c</sup> Jean-Pierre Haelters,<sup>a</sup> Pierre Lehn,<sup>b</sup> Tristan Montier<sup>b,c</sup>, Paul-Alain Jaffrès<sup>a,c</sup>

### **Summary**

|    |                                                                                                                       |   |
|----|-----------------------------------------------------------------------------------------------------------------------|---|
| S1 | Size, Zeta NMR spectra .....                                                                                          | 2 |
| S2 | DNA Condensation experiments .....                                                                                    | 3 |
| S3 | In vitro transfection assays – SKMel28 .....                                                                          | 4 |
| S4 | Comparison of transfection efficacy and toxicity of monocationic lipid <b>11</b> and dicationic lipid <b>19</b> ..... | 5 |
| S5 | Evaluation of toxicity .....                                                                                          | 6 |
| S6 | NMR spectra .....                                                                                                     | 7 |

**S1 Size and Zeta measurements**

| <b>Compound</b> | <b>Size – nm<br/>% of population<sup>a</sup></b> | <b>polydispersity<br/>Index</b> | <b>Zeta (mV)</b> |
|-----------------|--------------------------------------------------|---------------------------------|------------------|
| <b>10</b>       | 78 (+/- 52)                                      | 0.274                           | 42.1 (+/- 5)     |
| <b>11</b>       | 101 (+/- 52) ; 91%<br>22 (+/- 6) ; 9%            | 0.292                           | 50.3 (+/- 5)     |
| <b>12</b>       | 64 (+/- 34)                                      | 0.249                           | 40.9 (+/- 5)     |
| <b>17</b>       | 124 (+/- 60) ; 60 %<br>647 (+/- 329) ; 40%       | 0.209                           | 66.0 (+/- 8)     |
| <b>18</b>       | 110 (+/- 57) ; 64%<br>941 (+/- 519) ; 36%        | 0.413                           | 81.1 (+/- 8)     |
| <b>19</b>       | 160 (+/- 75)                                     | 0.261                           | 47.5 (+/- 5)     |
| <b>20</b>       | 111 (+/- 47)                                     | 0.214                           | 80.5 (+/- 5)     |
| <b>21</b>       | 246 (+/- 81)                                     | 0.343                           | 81.1 (+/- 7)     |
| <b>22</b>       | 136 (+/- 71)                                     | 0.344                           | 84.5 (+/- 8)     |

a) % of each population if the main population has an abundance below 95 %

## S2 DNA Condensation experiments

Lipoplexes were prepared by mixing pDNA (3,7kb, pCMV-Luc) with a liposomal solution. Shortly, 1  $\mu$ g of pDNA in OptiMem (Gibco) were added to cationic lipids (liposomal solution) at concentrations corresponding to the +/- charge ratios ranging from 1 to 8. These mixtures were incubated for 30 min at RT. The complexes were subjected to electrophoresis in 0.8% agarose gel at 100 V, 90 mA. The gel was stained with ethidium bromide (10 mg/mL) and then visualized using an UV transilluminator

**Figure S2-1** Monocationic dialkyl-arylphosphate

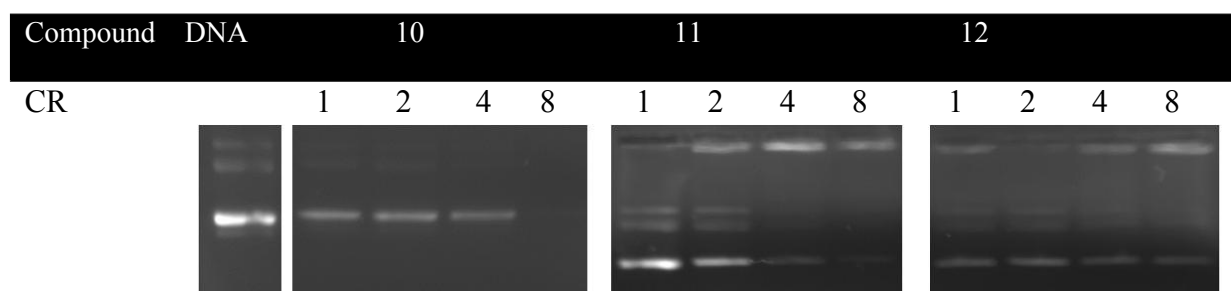

**Figure S2-2** Dicationic dialkyl-arylphosphate

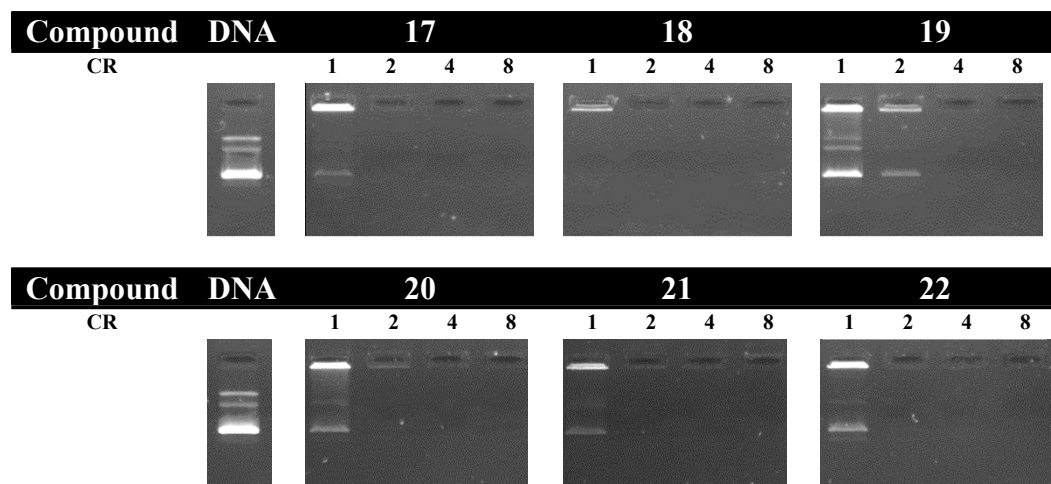

### S3 In vitro transfection assays – SKMel28

Transfection efficacies of dicationic dialkylarylphosphate as determined using a luciferase-encoding pDNA and SKMel28 cell line. The CRs used were either 1, 2, 4, and 8. The transfection efficacy was expressed in RLU/mg of proteins.

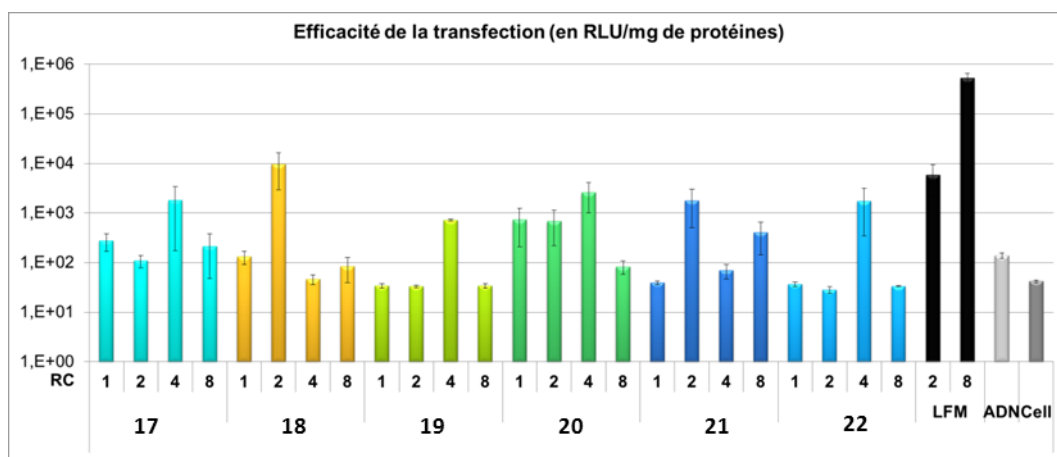

## S4 Comparison of transfection efficacy and toxicity of monocationic lipid 11 and di-cationic lipid 19.

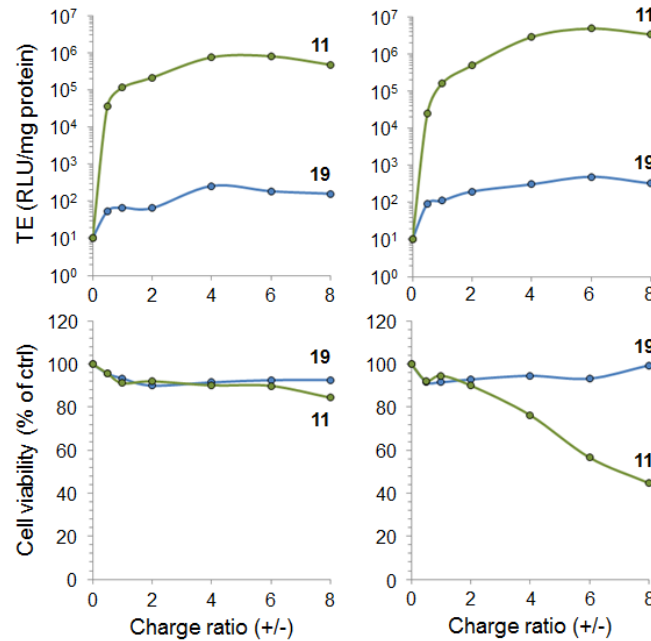

Figure S4 *In vitro* transfection efficiency (TE, top panels) and cell viability (bottom panels) following treatment with monocationic **11** and dicationic **19**-based lipoplexes. Cell viability was determined thanks to the Vialight Kit (Lonza) according to the manufacturer's recommendations. Left panels, 16HBE cell line, and right panels, CFBE cell line.

## S5 Evaluation of toxicity

- Monocationic dialkyl-arylphosphate

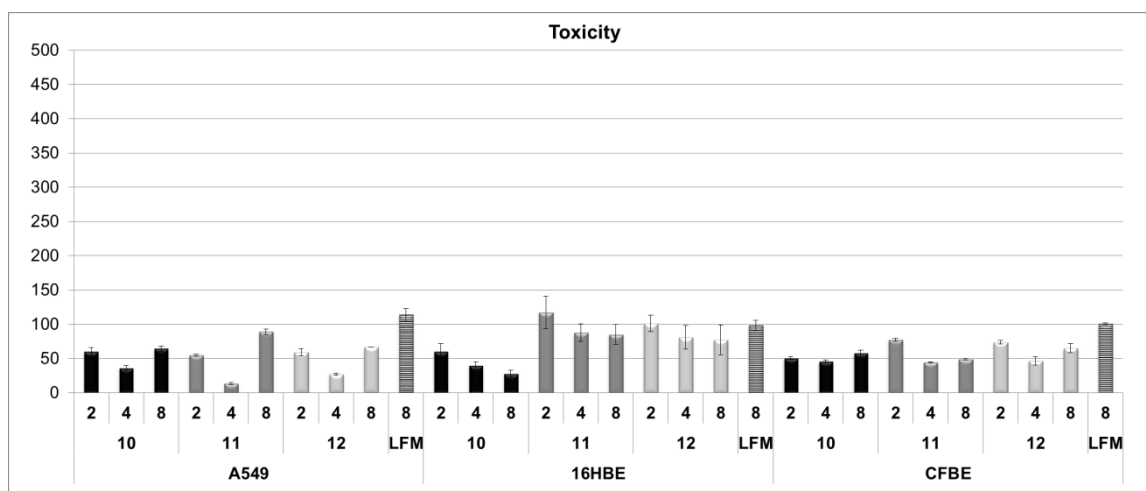

- Dicationic dialkyl-arylphosphate

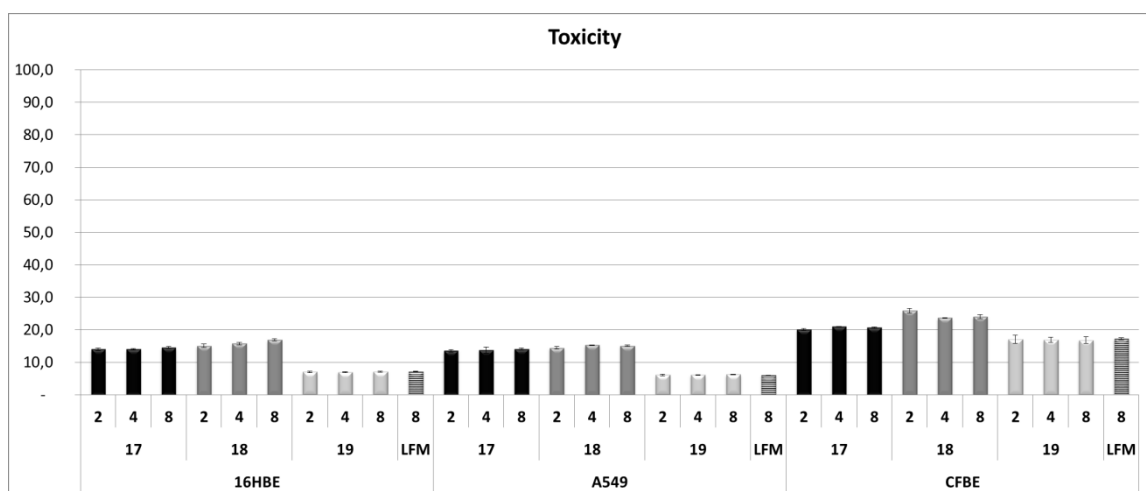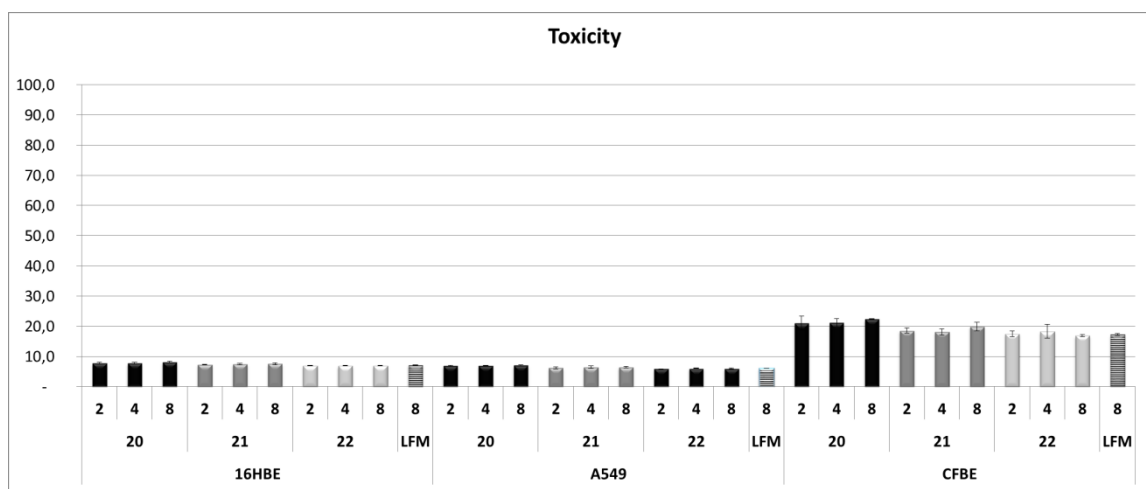

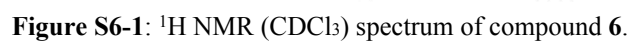

SL119

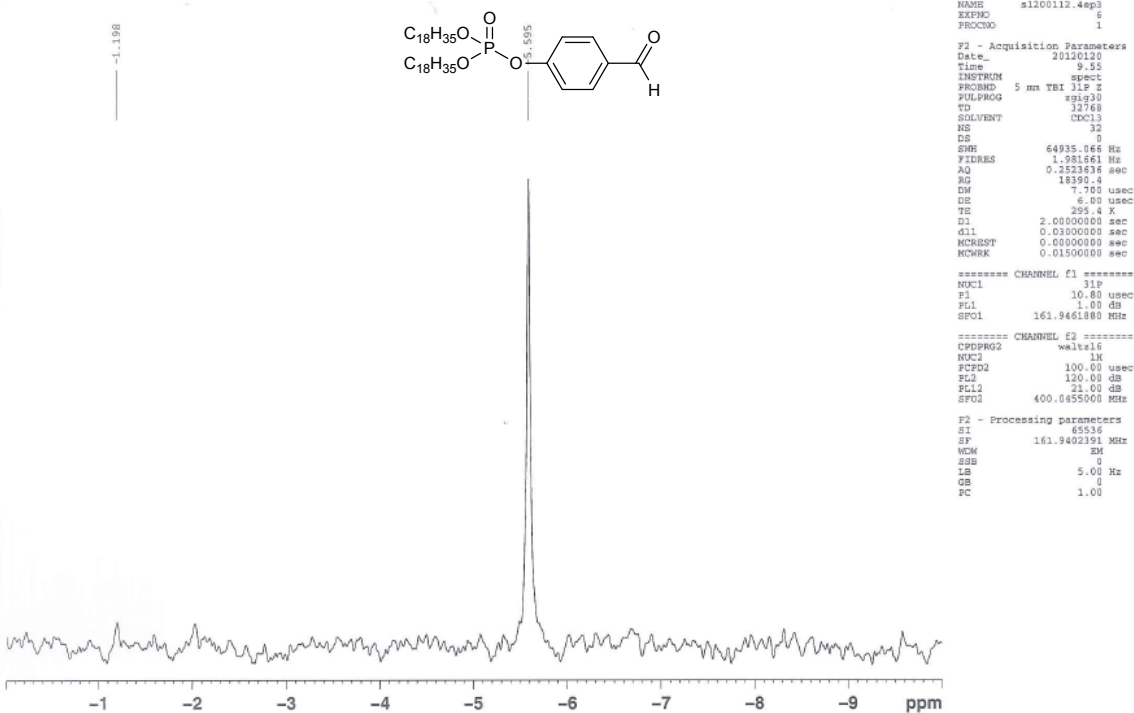Figure S6-2: <sup>31</sup>P NMR (CDCl<sub>3</sub>) spectrum of compound 6.

## Supporting materials

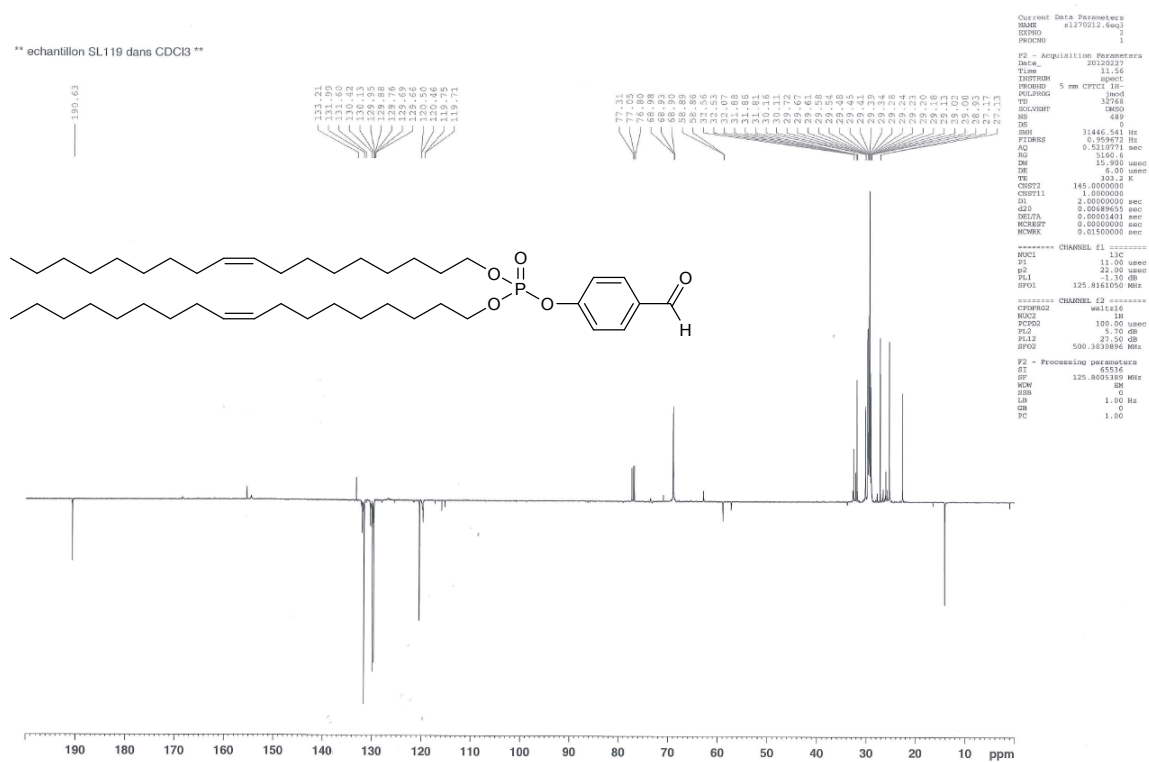

**Figure S6-3:**  $^{13}\text{C}$  jmod ( $\text{CDCl}_3$ ) spectrum of compound **6**.

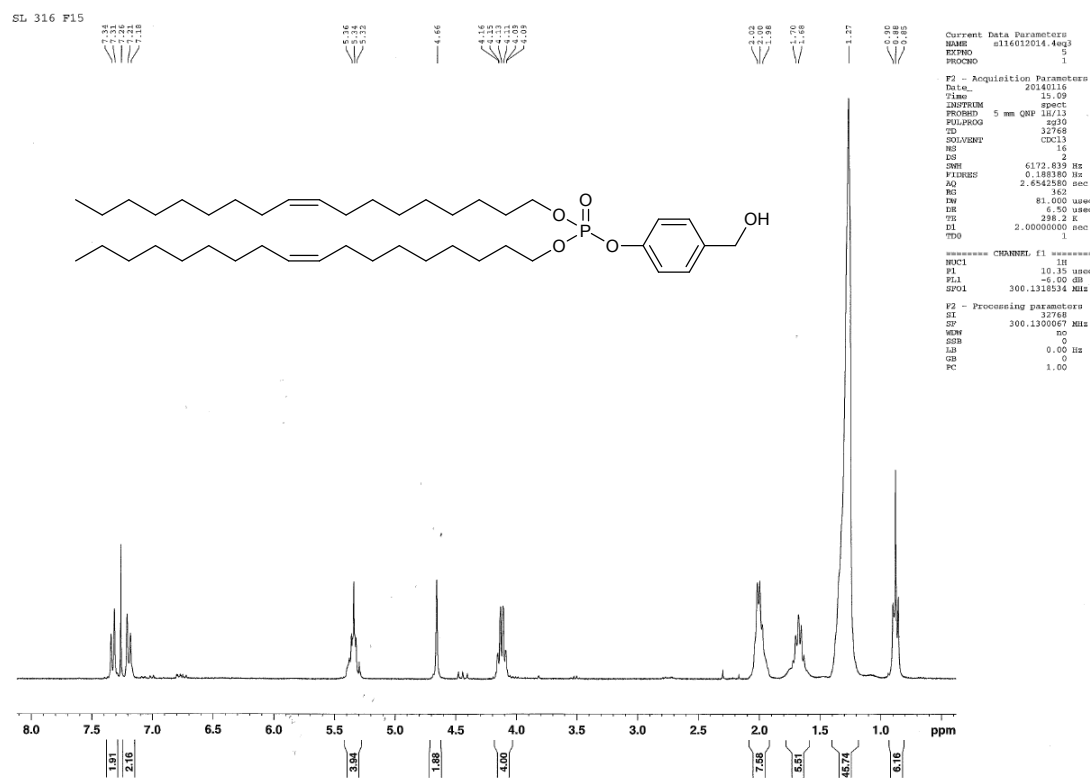

**S6-4:**  $^1\text{H}$  NMR ( $\text{CDCl}_3$ ) spectrum of compound 7.

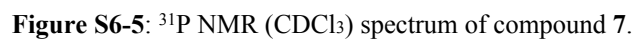

# Supporting materials

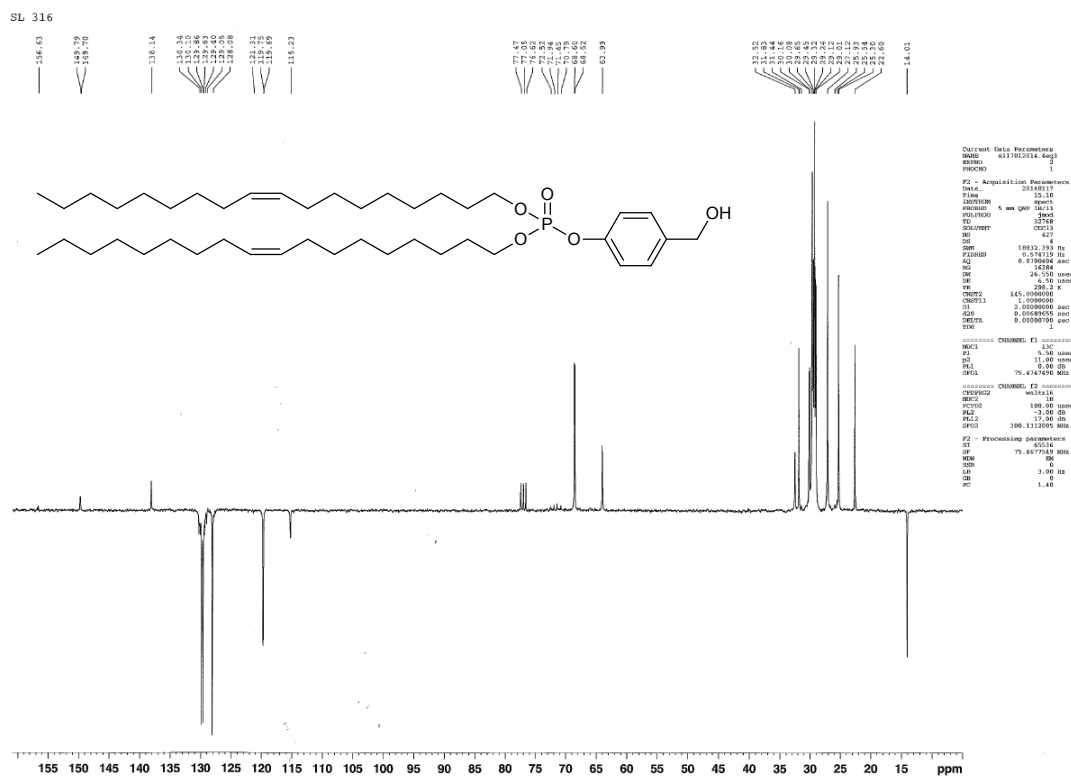

Figure S6-6: <sup>13</sup>C jmod (CDCl<sub>3</sub>) spectrum of compound 7.

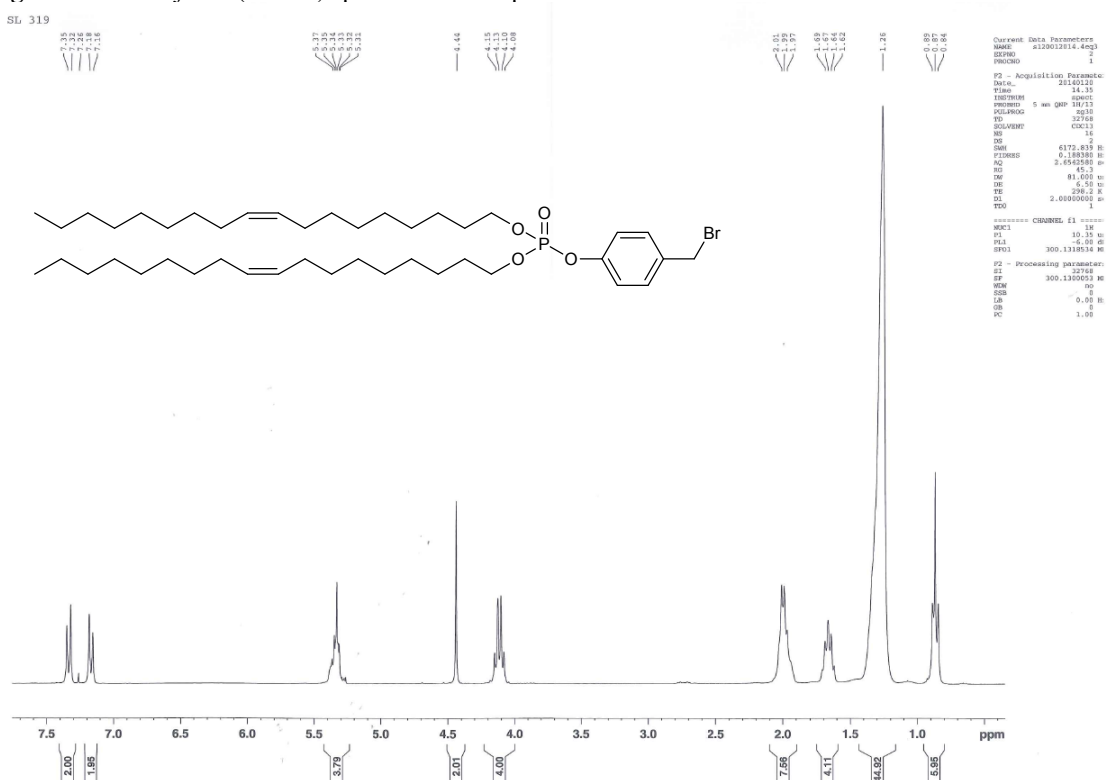

Figure S6-7: <sup>1</sup>H NMR (CDCl<sub>3</sub>) spectrum of compound 8.

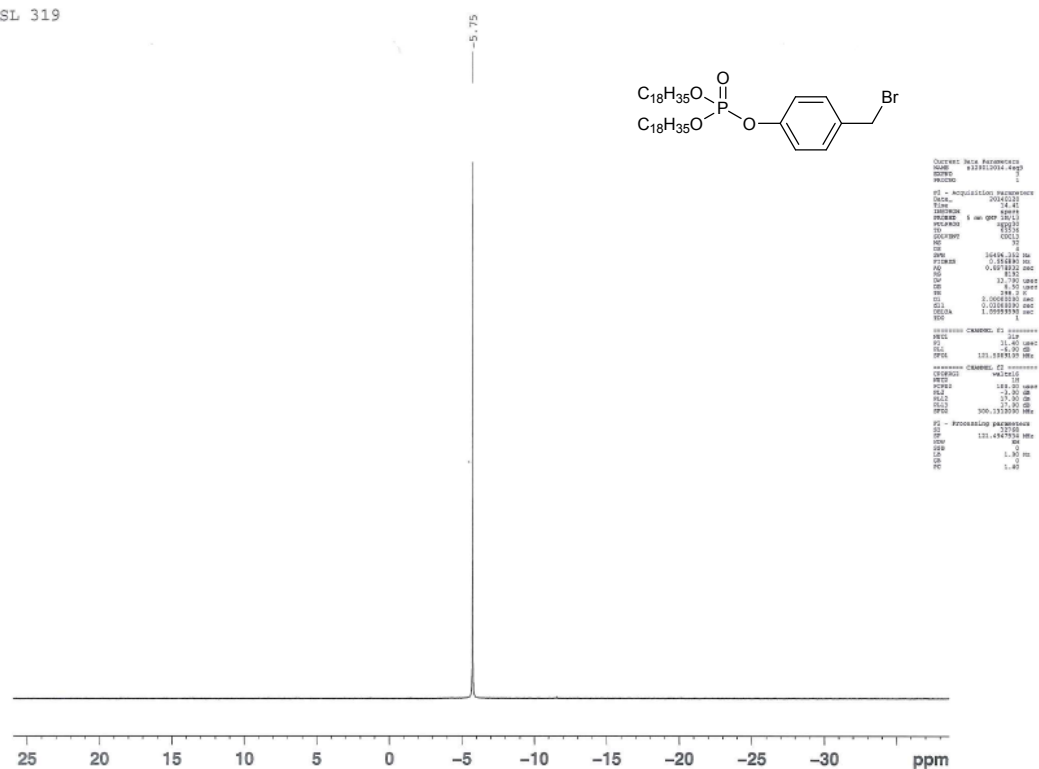

**Figure S6-8:**  $^{31}\text{P}$  NMR ( $\text{CDCl}_3$ ) spectrum of compound **8**.

# Supporting materials

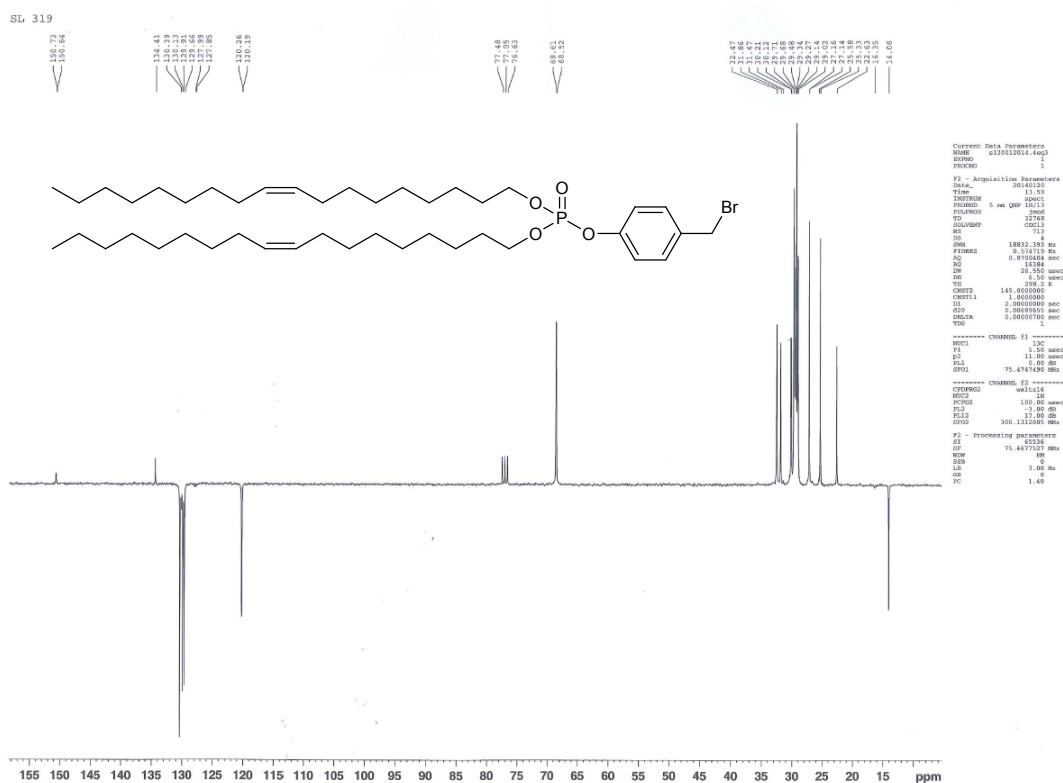

Figure S6-9:  $^{13}\text{C}$  jmod ( $\text{CDCl}_3$ ) spectrum of compound 8.

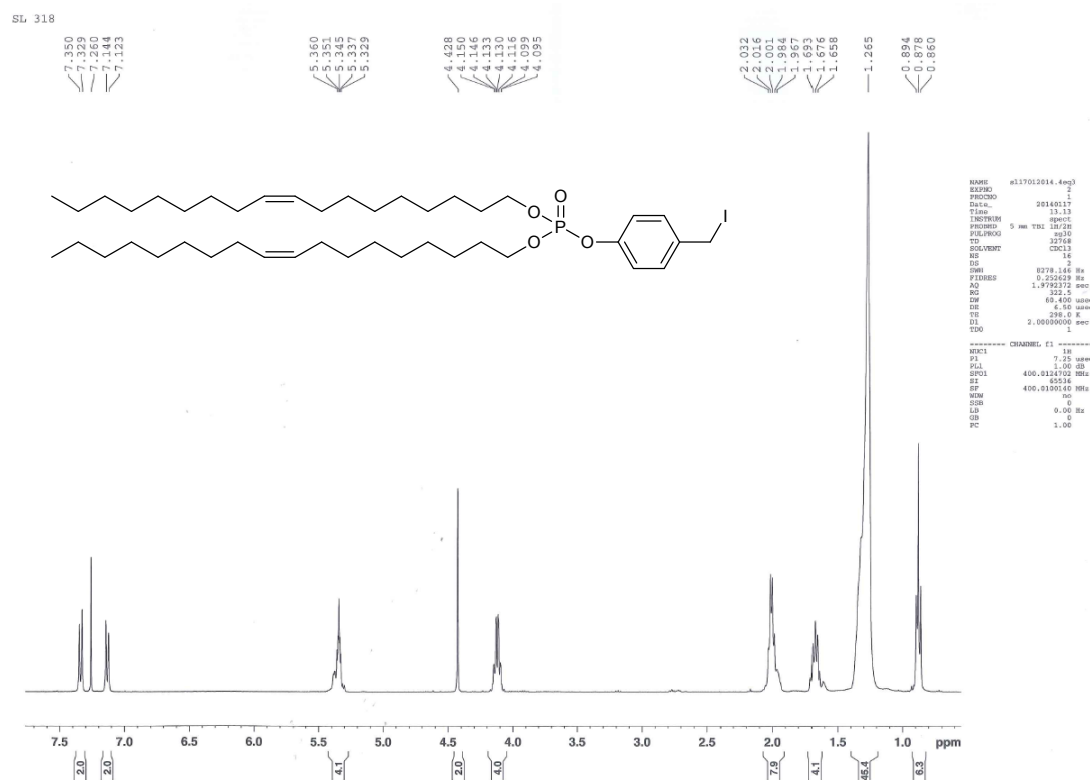

Figure S6-10:  $^1\text{H}$  NMR ( $\text{CDCl}_3$ ) spectrum of compound 9.

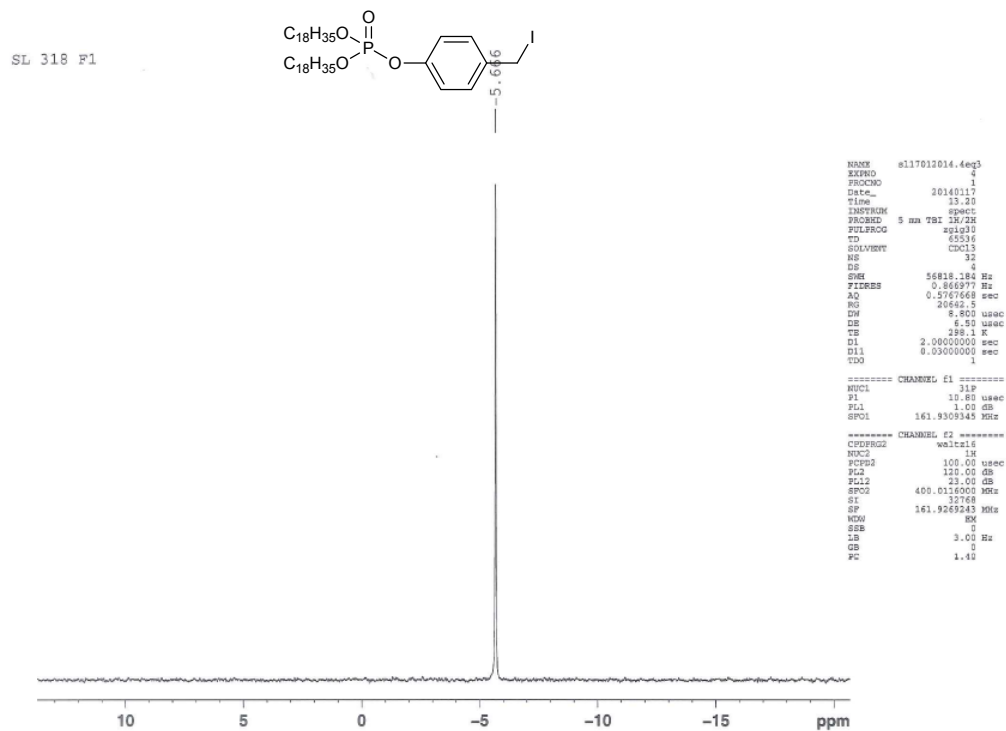

**Figure S6-11:**  $^{31}\text{P}$  NMR ( $\text{CDCl}_3$ ) spectrum of compound **9**.

## Supporting materials

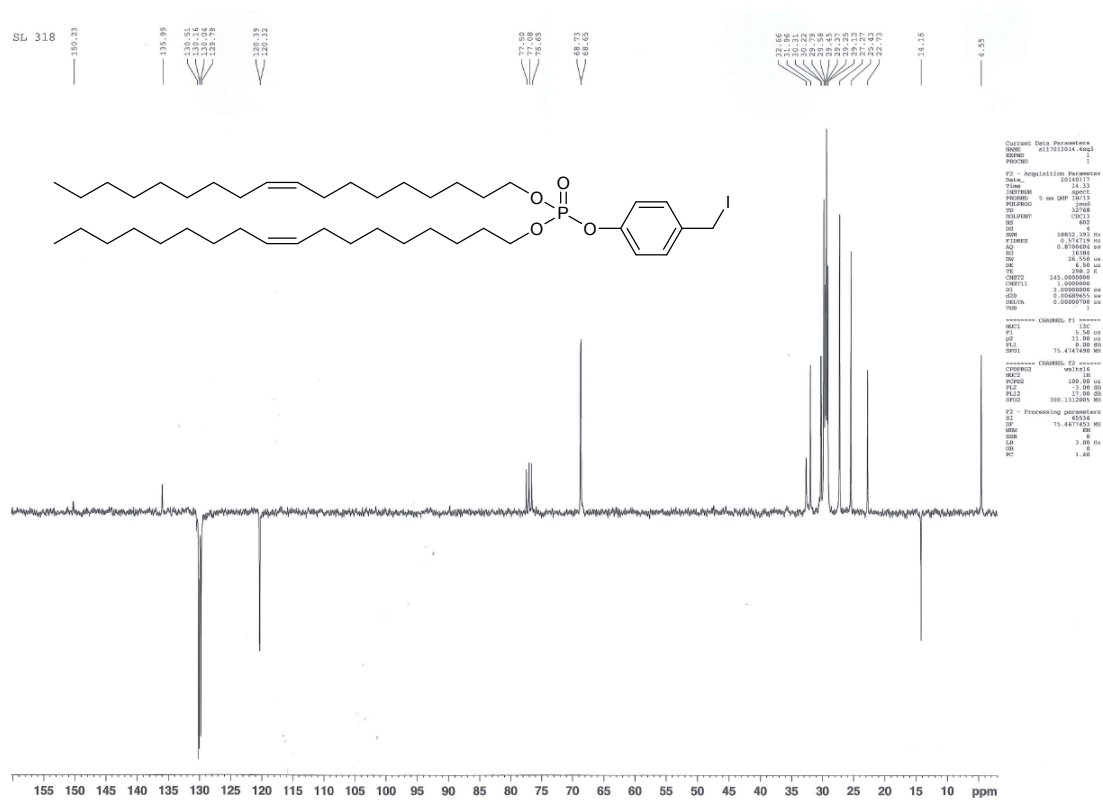

**Figure S6-12:**  $^{13}\text{C}$  jmod ( $\text{CDCl}_3$ ) spectrum of compound **9**.

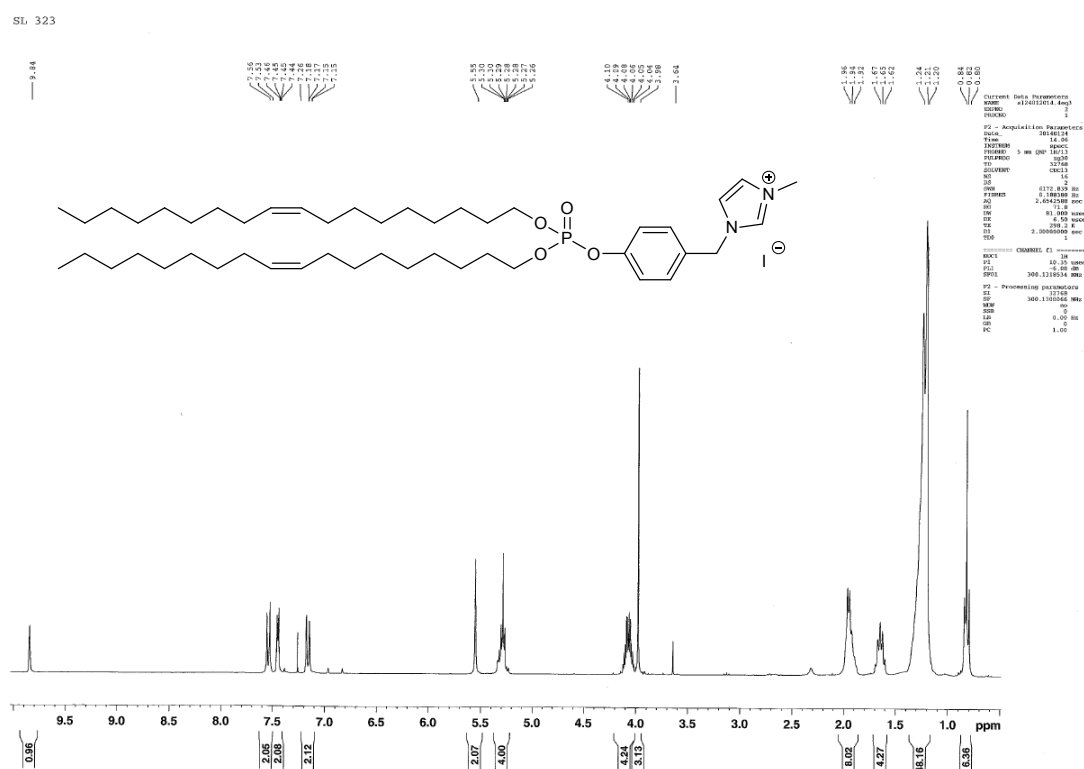

**Figure S6-13:**  $^1\text{H}$  NMR ( $\text{CDCl}_3$ ) spectrum of compound **10**.

SL 323 Tete imidazolium

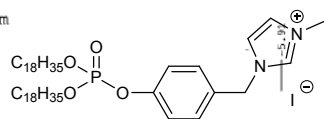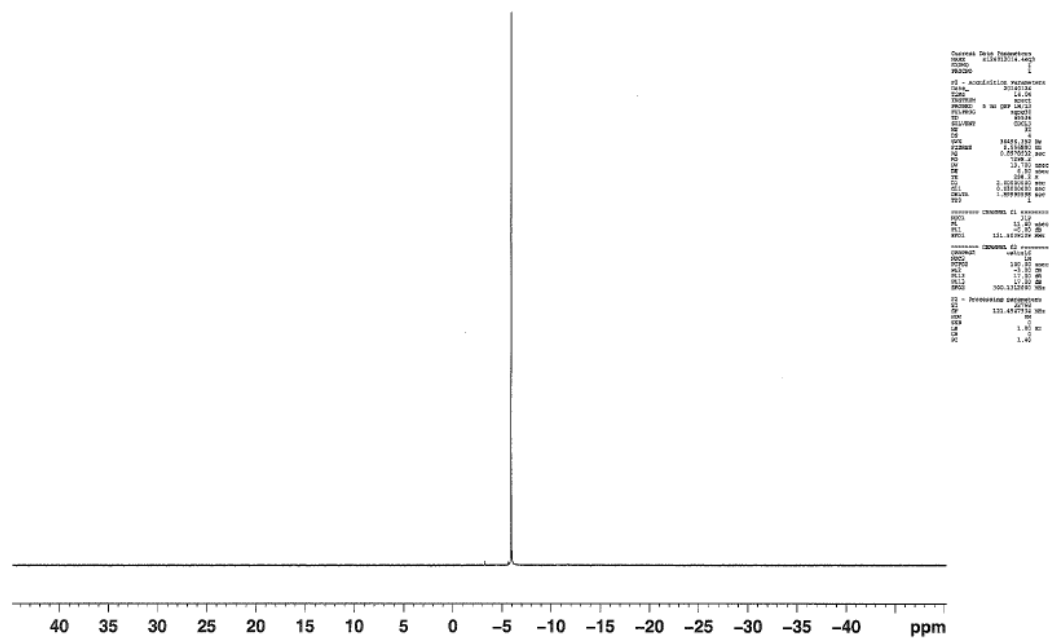Figure S6-14: <sup>31</sup>P NMR (CDCl<sub>3</sub>) spectrum of compound 10.

## Supporting materials

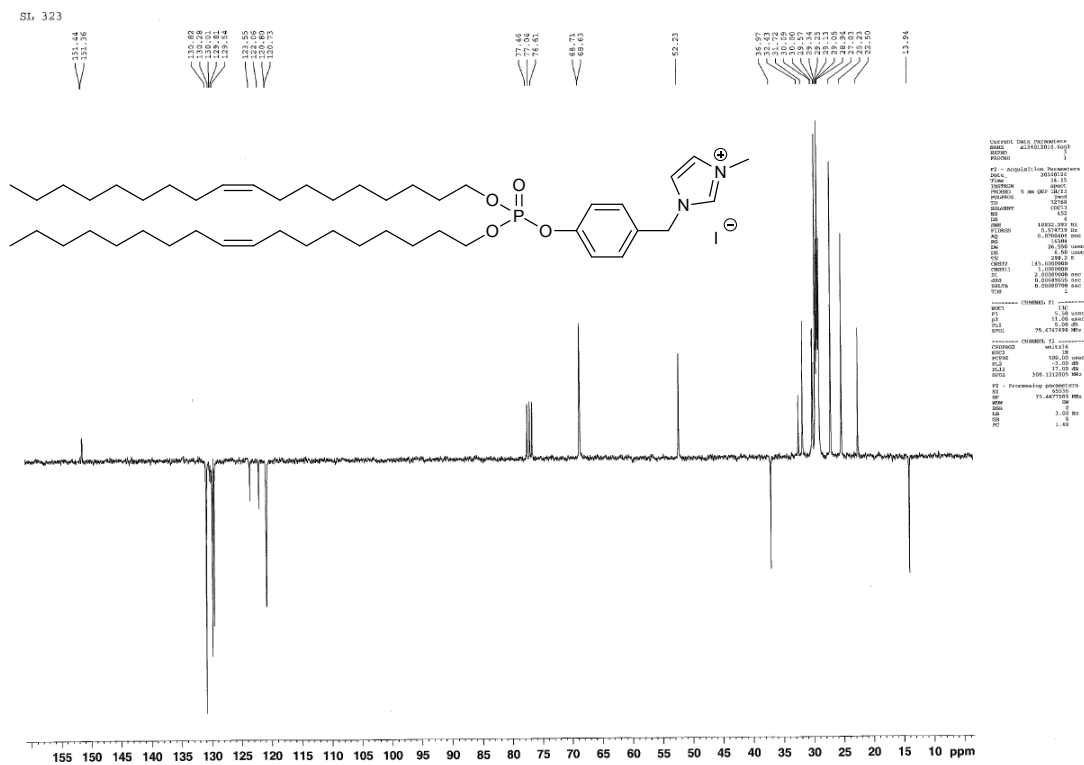

**Figure S6-15:**  $^{13}\text{C}$  jmod ( $\text{CDCl}_3$ ) spectrum of compound **10**.

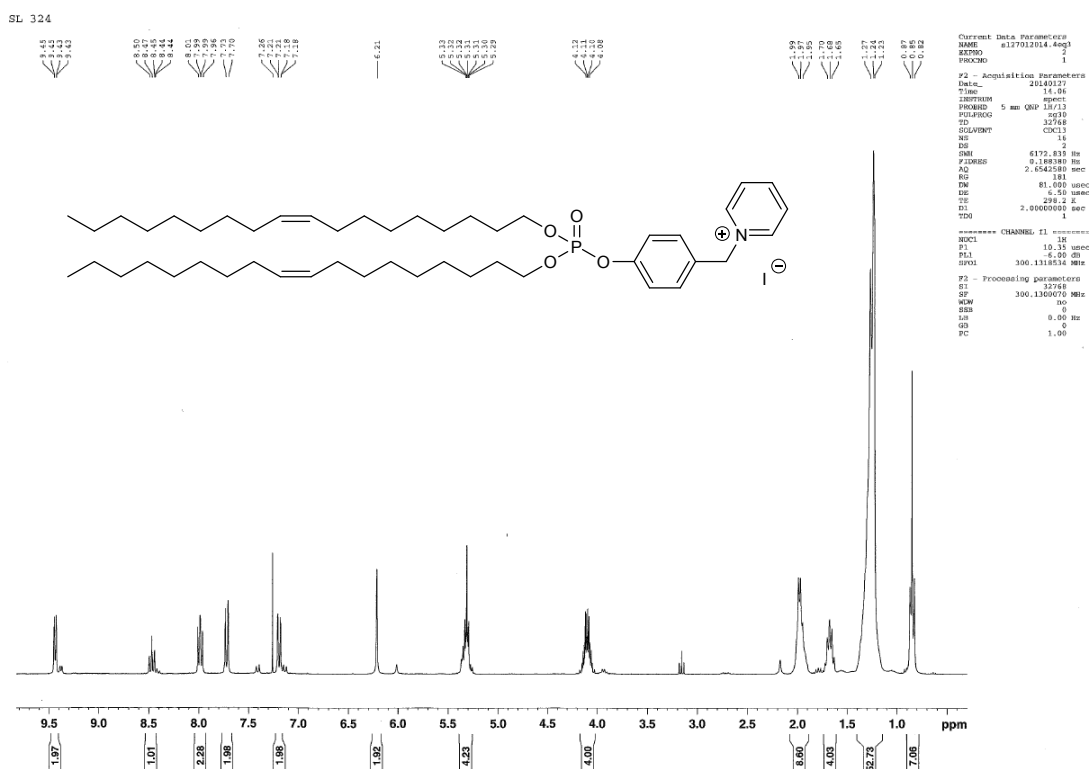

**Figure S6-16:**  $^1\text{H}$  NMR ( $\text{CDCl}_3$ ) spectrum of compound **11**.

SL 324

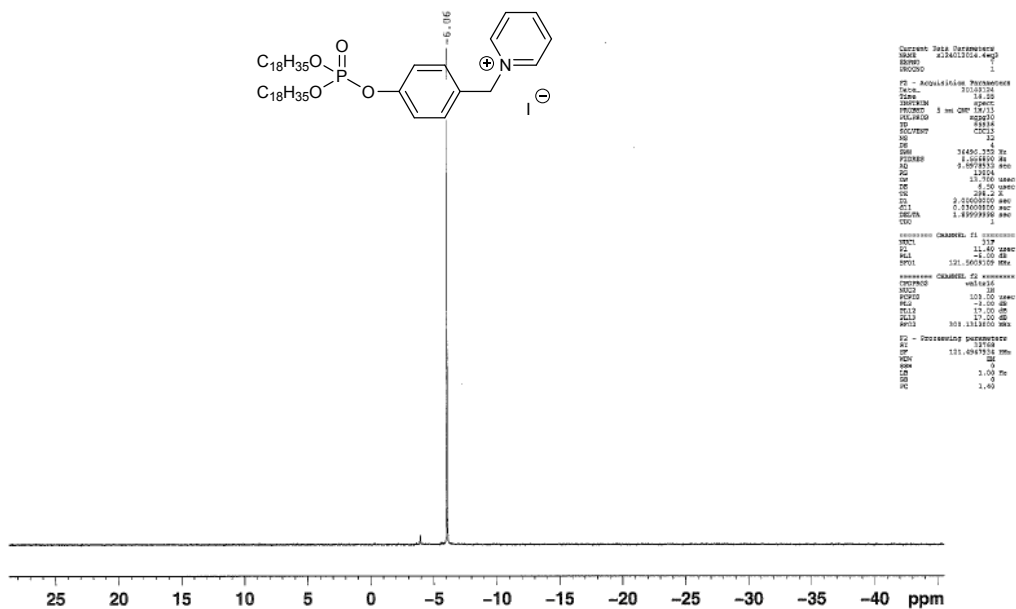

## Supporting materials

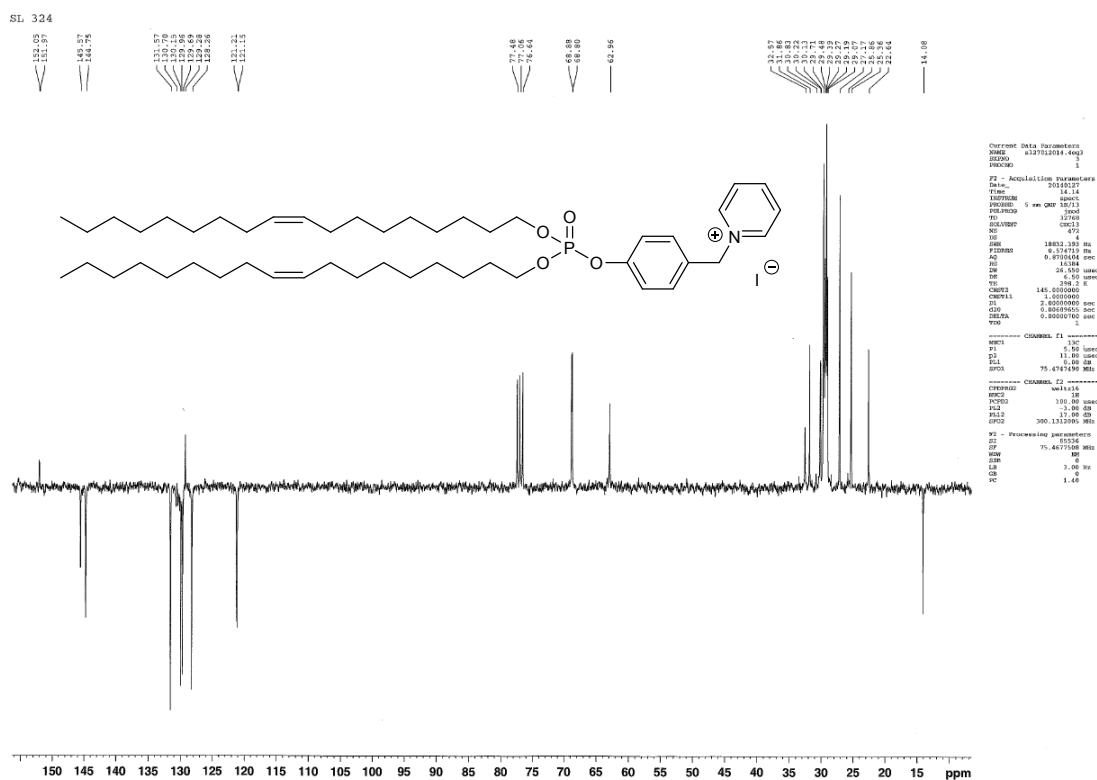

**Figure S6-18:**  $^{13}\text{C}$  jmod ( $\text{CDCl}_3$ ) spectrum of compound **11**.

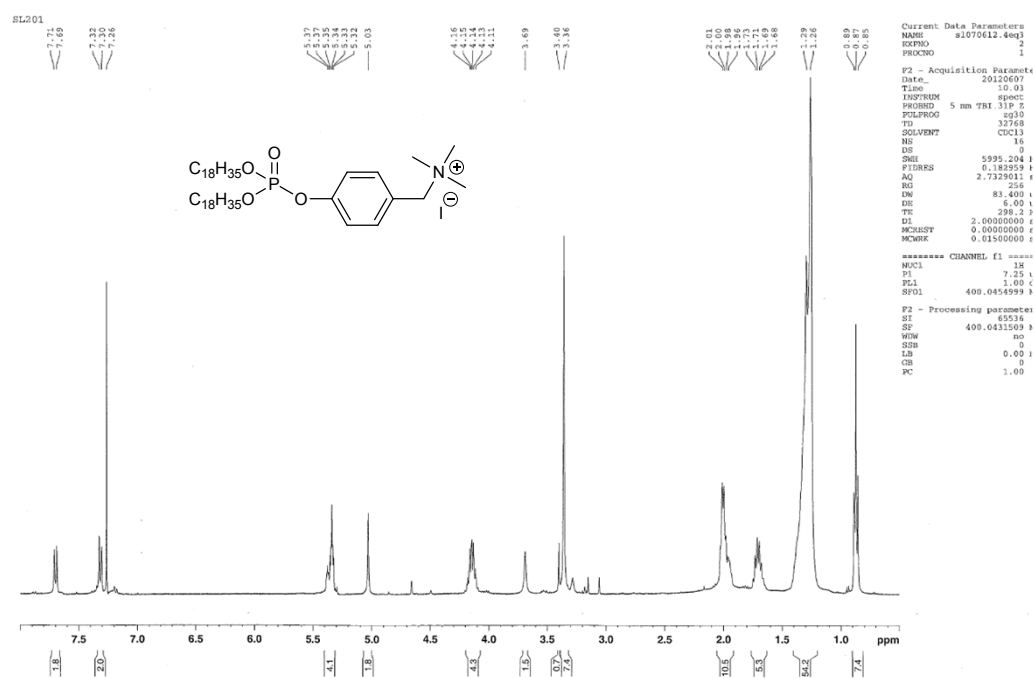

**Figure S6-19:**  $^1\text{H}$  NMR ( $\text{CDCl}_3$ ) spectrum of compound **12**.

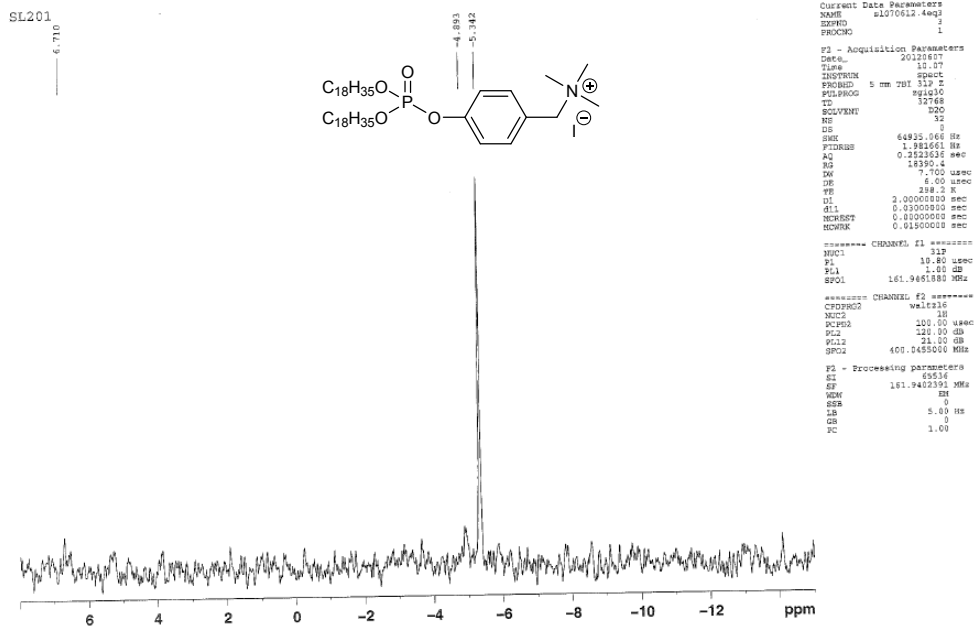Figure S6-20:  $^{31}\text{P}$  NMR ( $\text{CDCl}_3$ ) spectrum of compound 12.

## Supporting materials

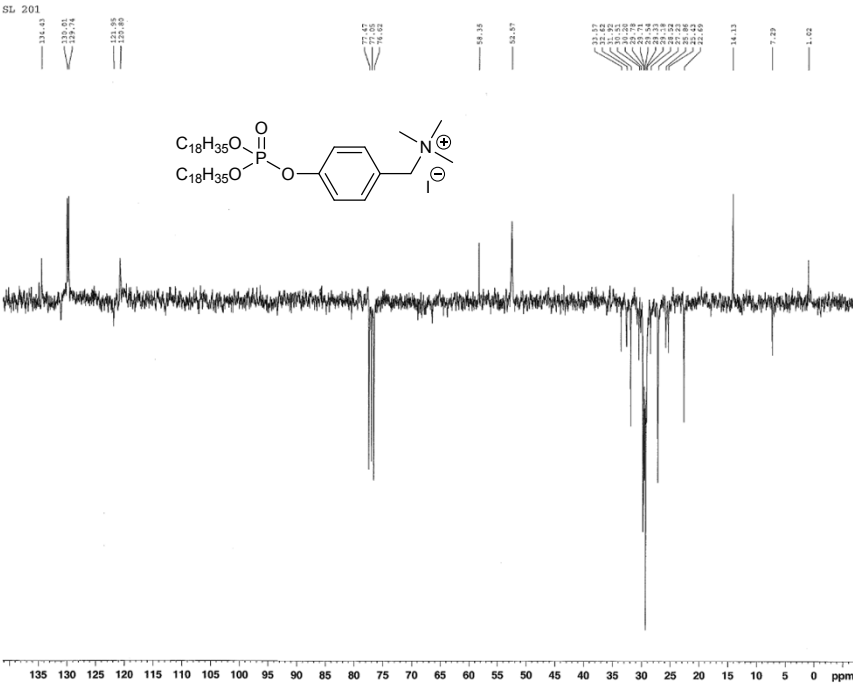

**Figure S6-21:**  $^{13}\text{C}$  jmod ( $\text{CDCl}_3$ ) spectrum of compound **12**.

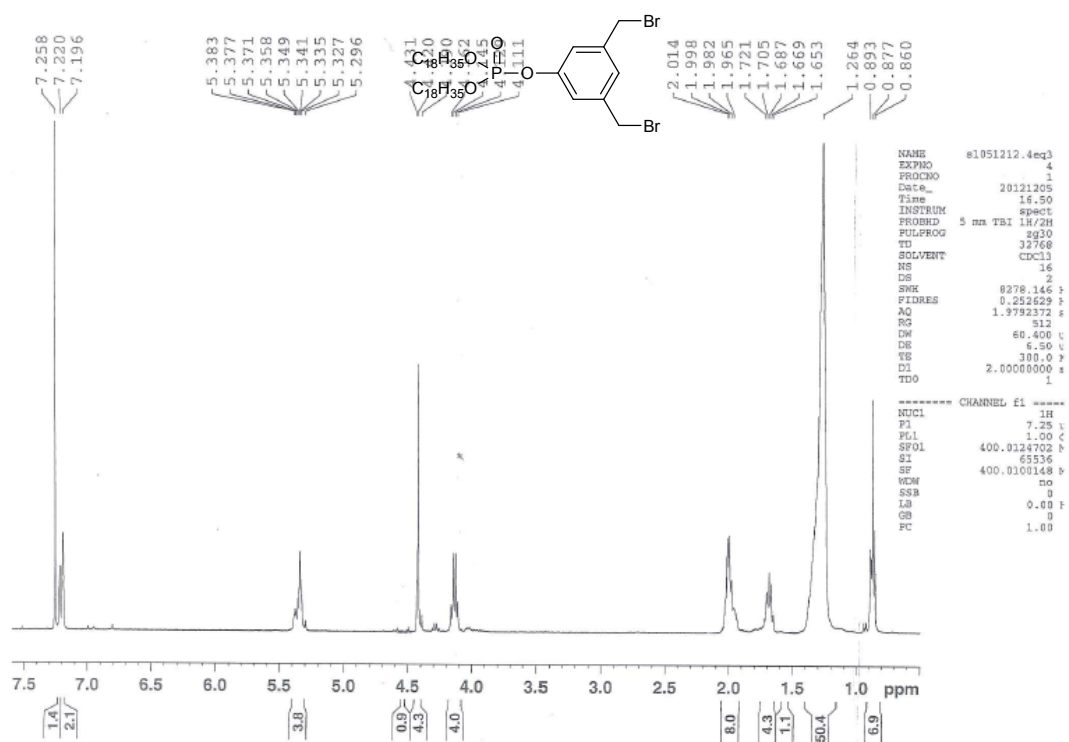Figure S6-22: <sup>1</sup>H NMR (CDCl<sub>3</sub>) spectrum of compound 14.

SL249 Apres colonne F2

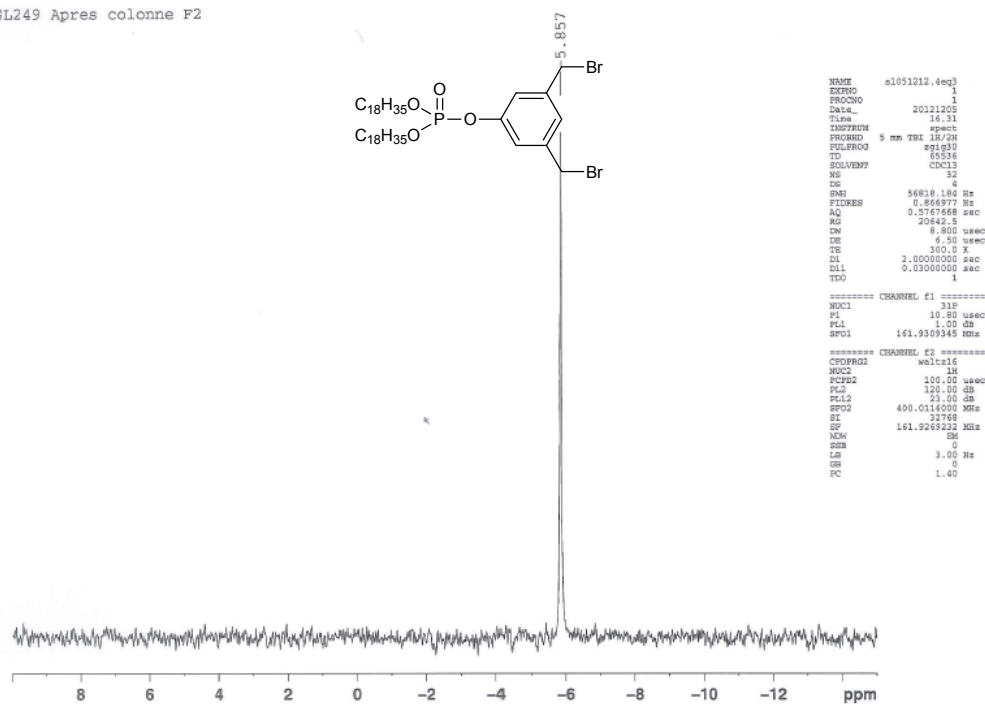Figure S6-23: <sup>31</sup>P NMR (CDCl<sub>3</sub>) spectrum of compound 14.

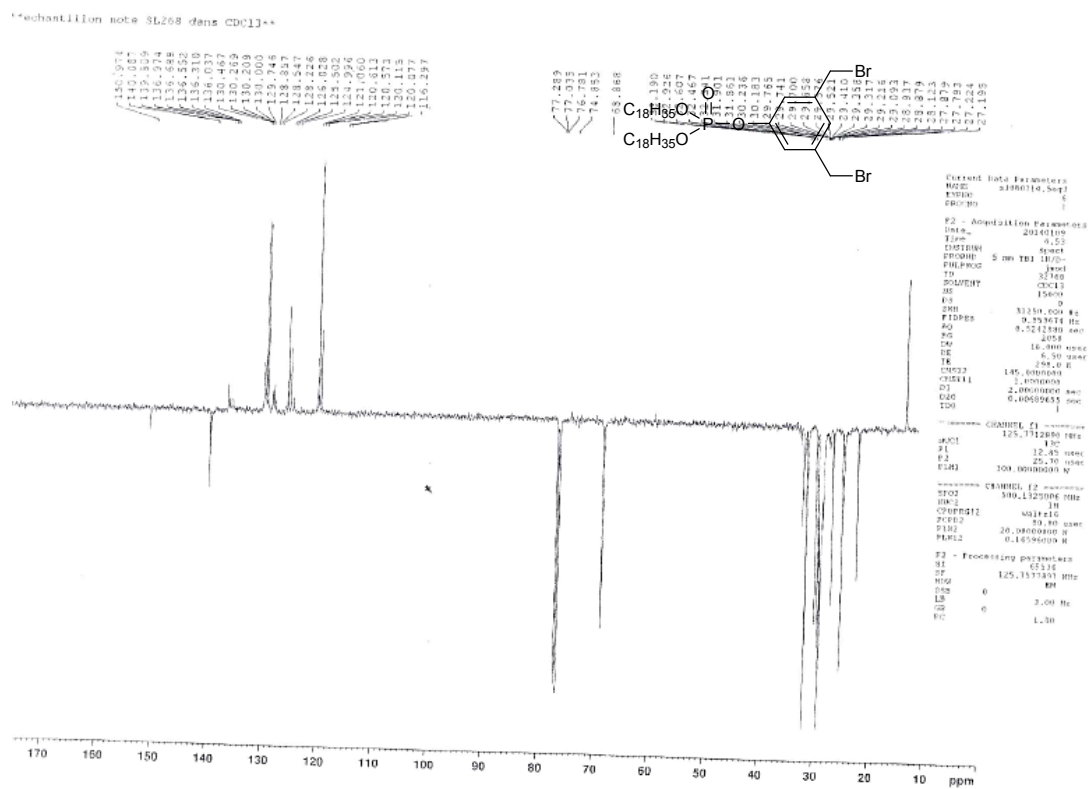Figure S6-24:  $^{13}\text{C}$  jmod ( $\text{CDCl}_3$ ) spectrum of compound 14.

## Supporting materials

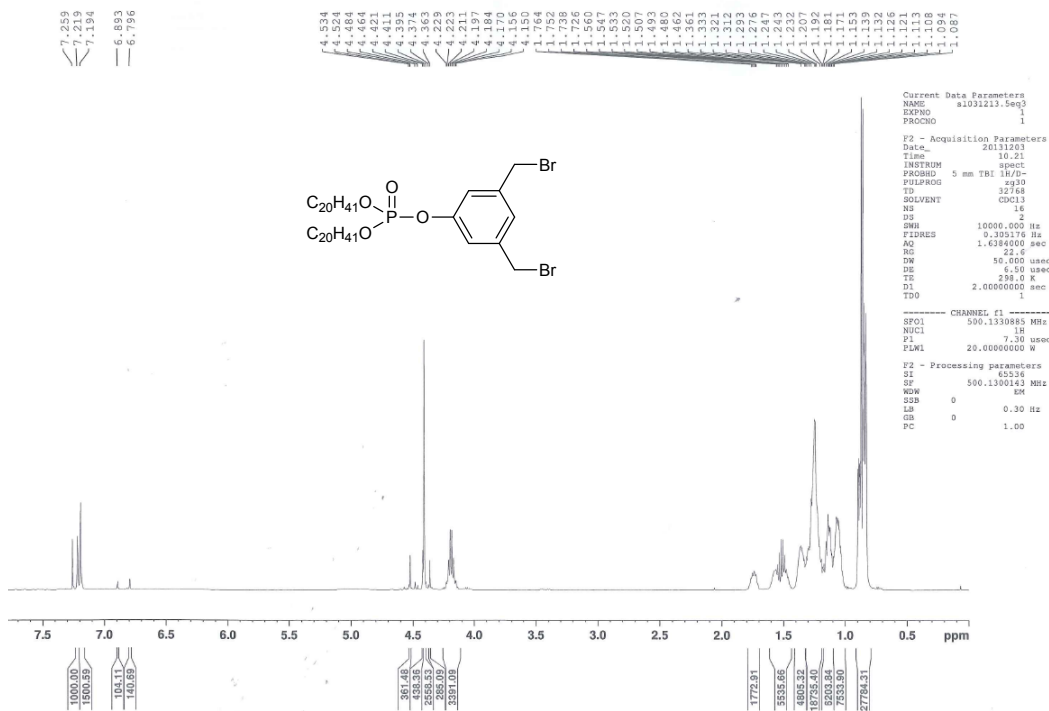

**Figure S6-25:**  $^1\text{H}$  NMR ( $\text{CDCl}_3$ ) spectrum of compound **15**.

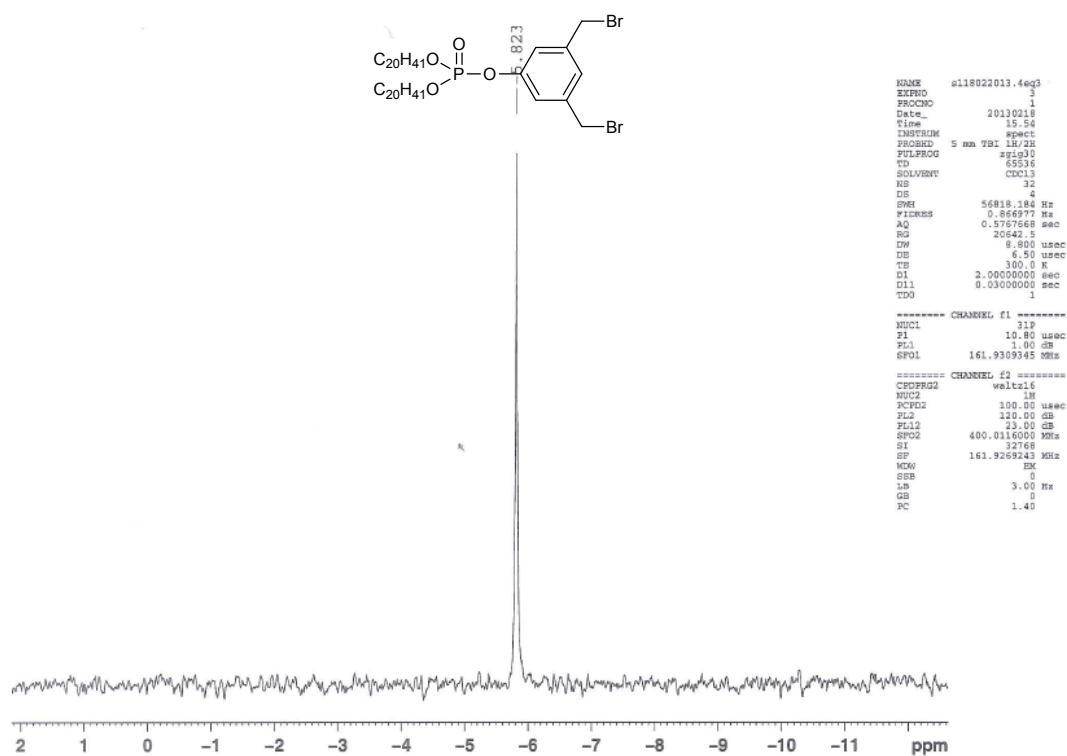

Figure S6-26: <sup>31</sup>P NMR (CDCl<sub>3</sub>) spectrum of compound 15.

# Supporting materials

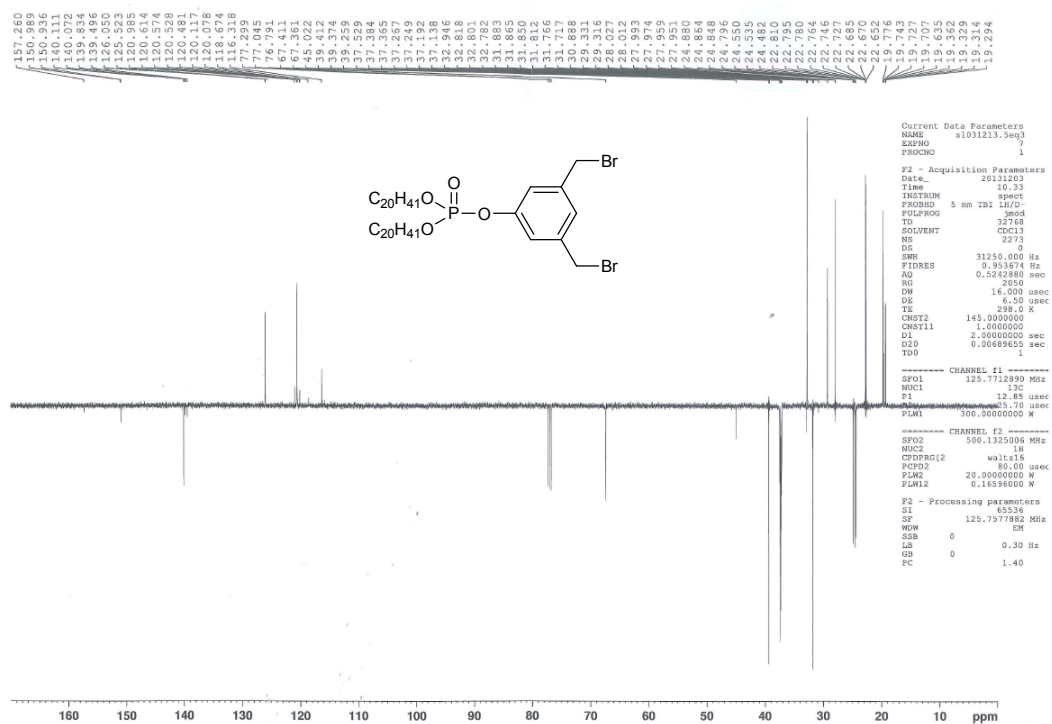

Figure S6-27: <sup>13</sup>C jmod (CDCl<sub>3</sub>) spectrum of compound 15.

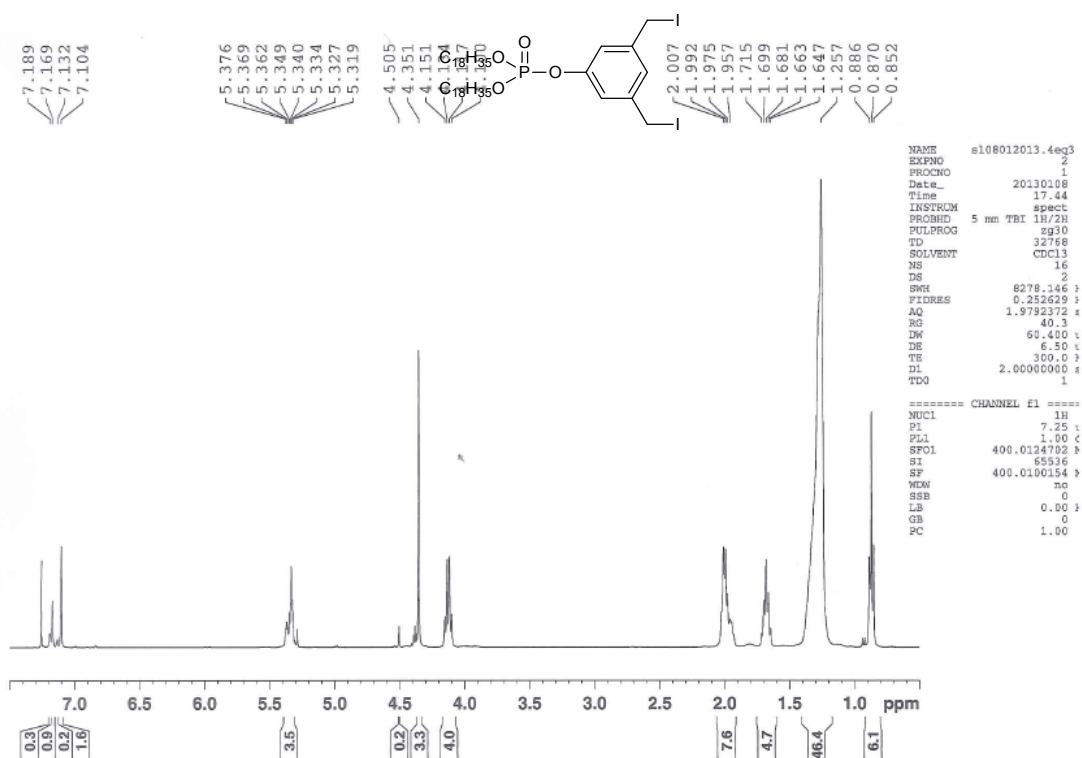Figure S6-28: <sup>1</sup>H NMR (CDCl<sub>3</sub>) spectrum of compound 16.

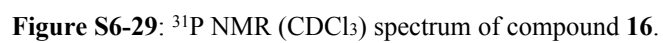

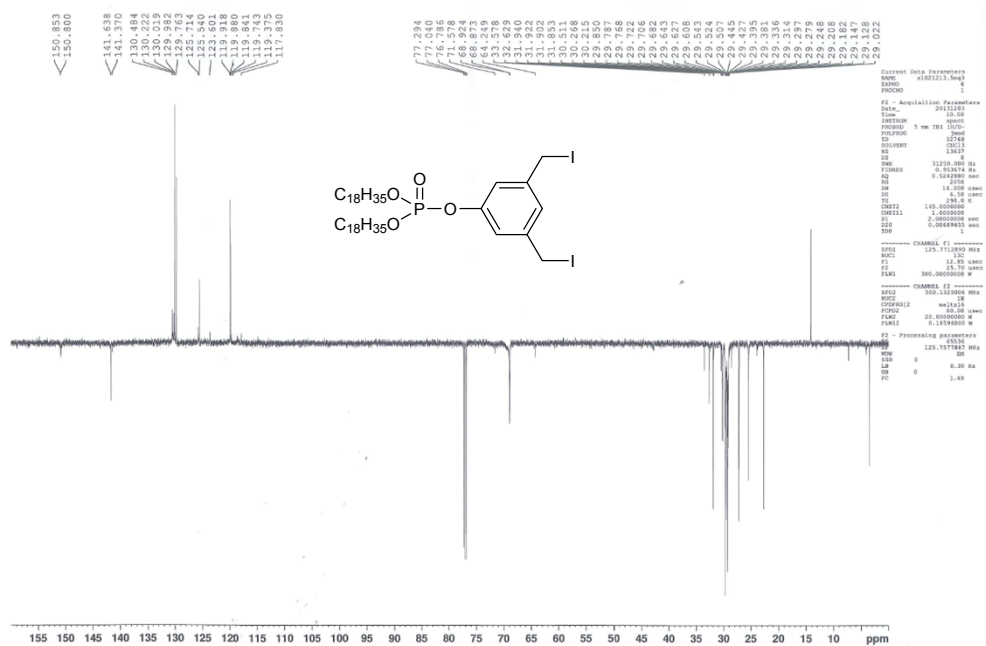Figure S6-30: <sup>13</sup>C jmod (CDCl<sub>3</sub>) spectrum of compound 16.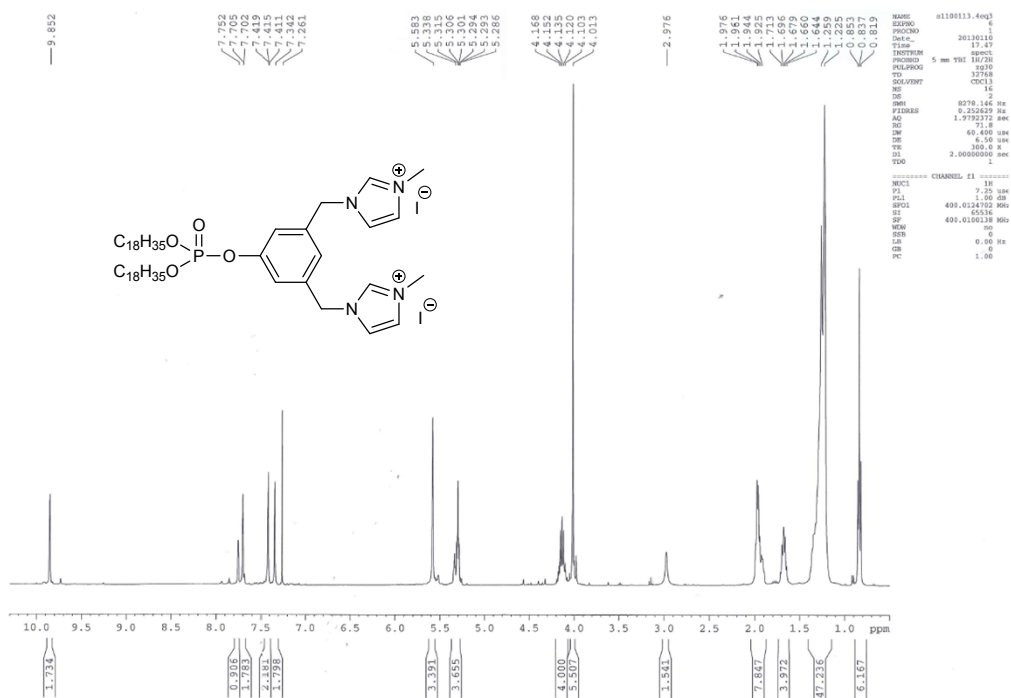Figure S6-31: <sup>1</sup>H NMR (CDCl<sub>3</sub>) spectrum of compound 17.

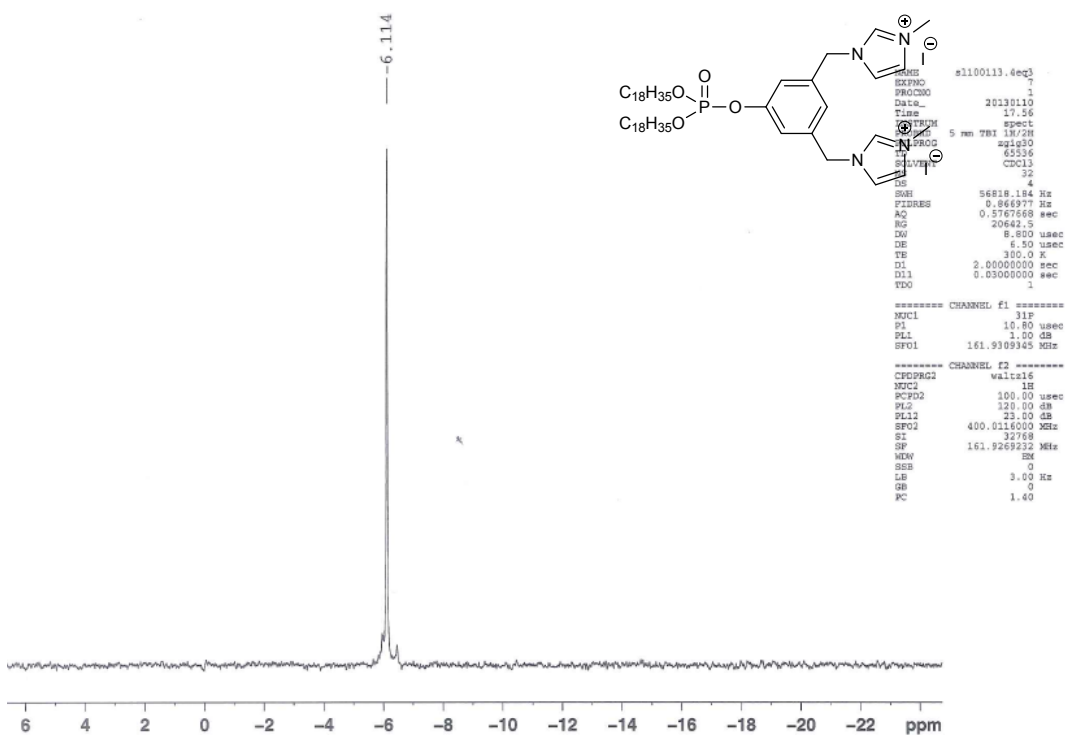Figure S6-32: <sup>31</sup>P NMR (CDCl<sub>3</sub>) spectrum of compound 17.

## Supporting materials

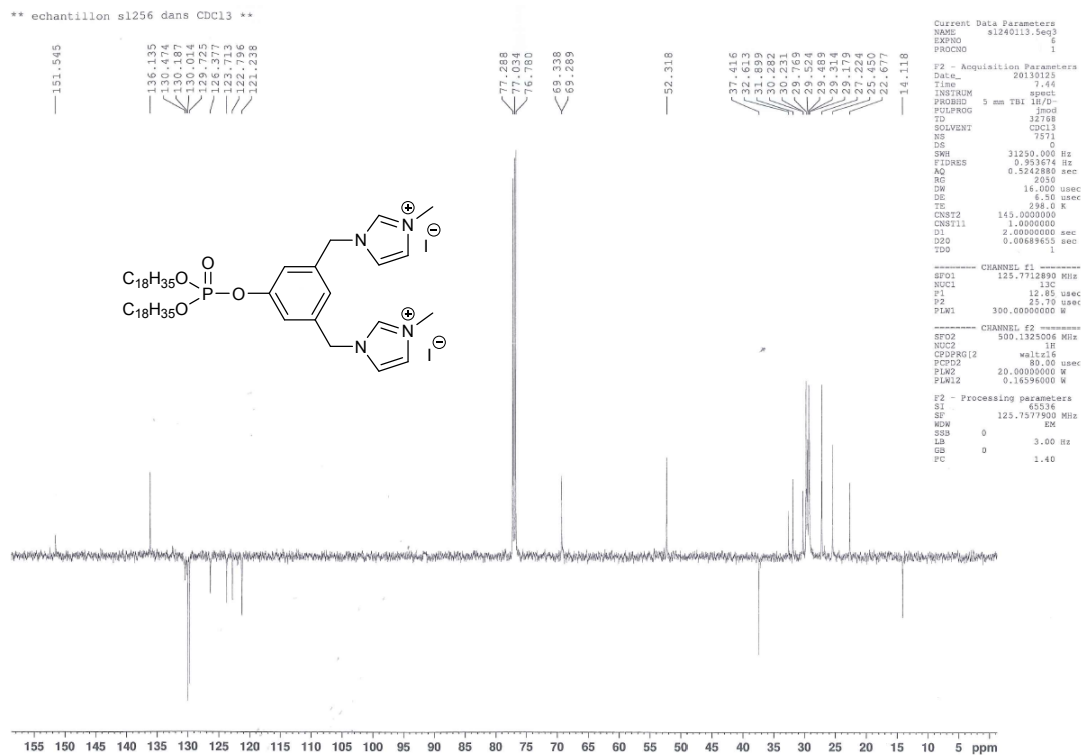

**Figure S6-33:**  $^{13}\text{C}$  jmod ( $\text{CDCl}_3$ ) spectrum of compound **17**.

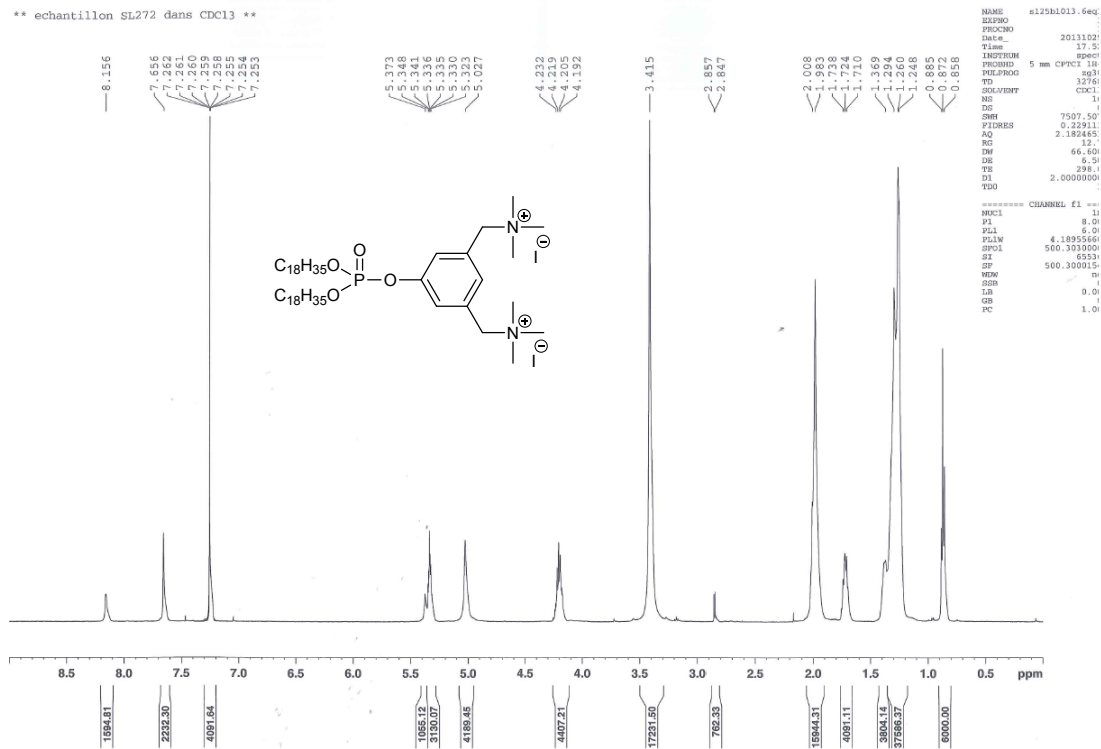

**Figure S6-34:**  $^1\text{H}$  NMR ( $\text{CDCl}_3$ ) spectrum of compound **18**.

SL272

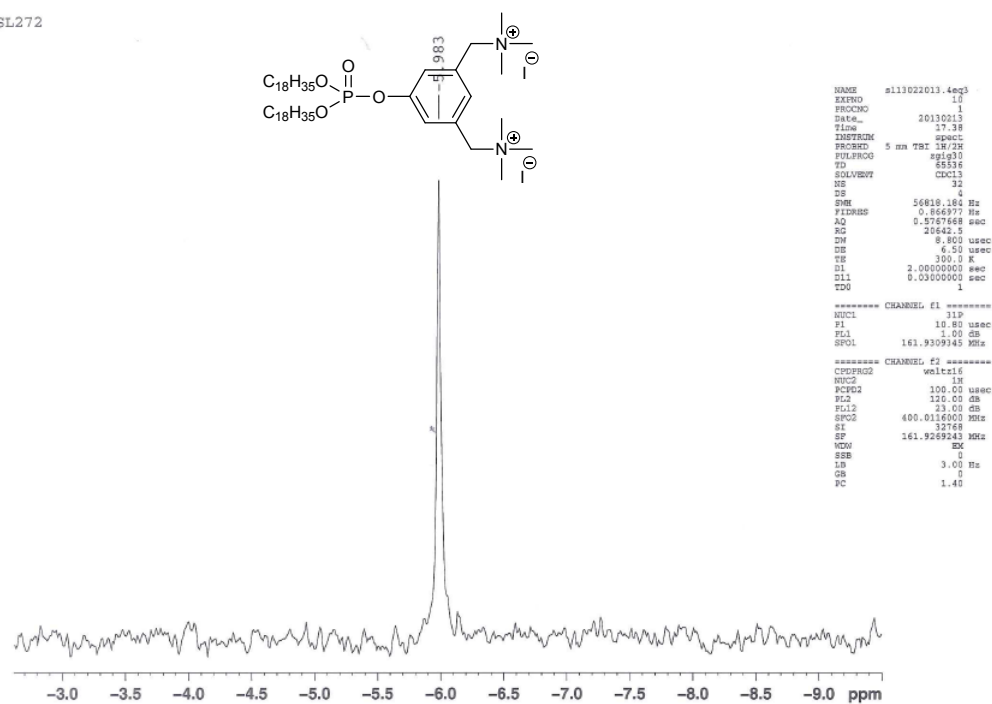

**Figure S6-35:**  $^{31}\text{P}$  NMR ( $\text{CDCl}_3$ ) spectrum of compound **18**.

## Supporting materials

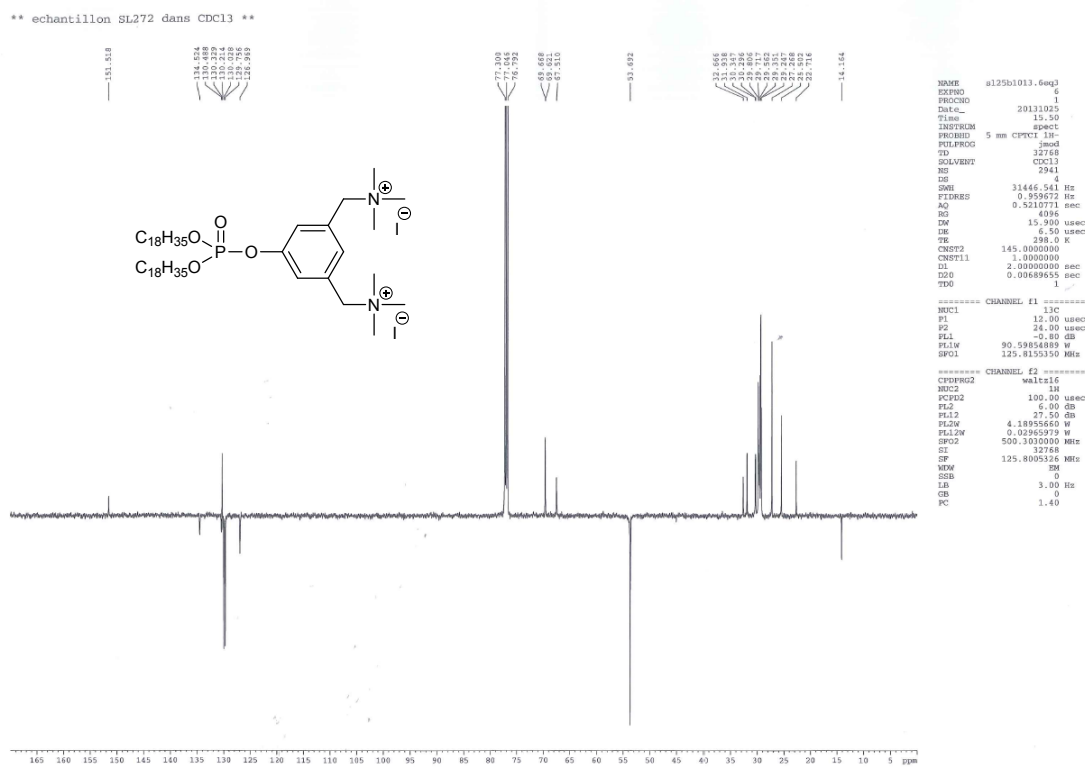

**Figure S6-36:**  $^{13}\text{C}$  jmod ( $\text{CDCl}_3$ ) spectrum of compound **18**.

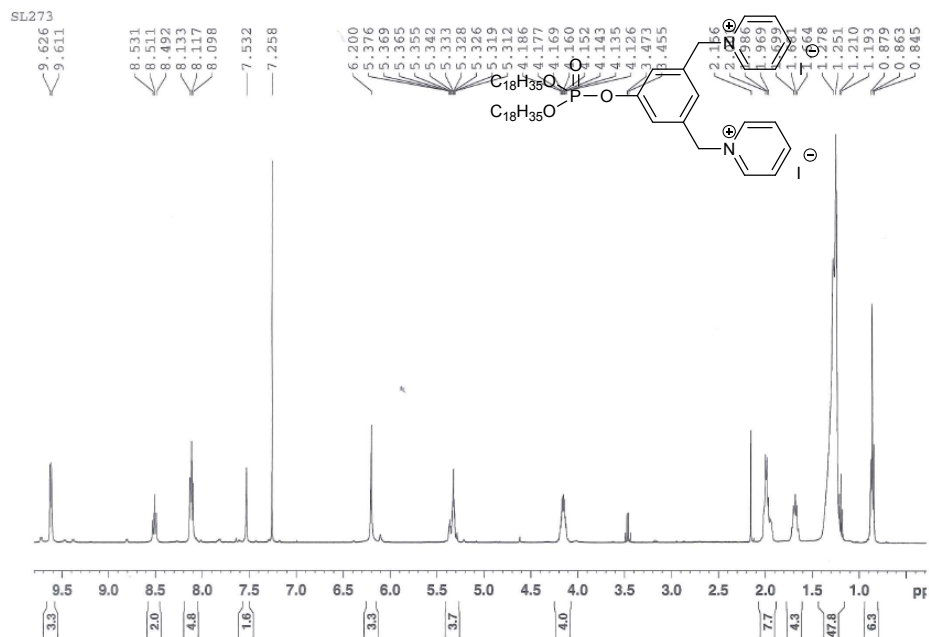

**Figure S6-37:**  $^1\text{H}$  NMR ( $\text{CDCl}_3$ ) spectrum of compound **19**.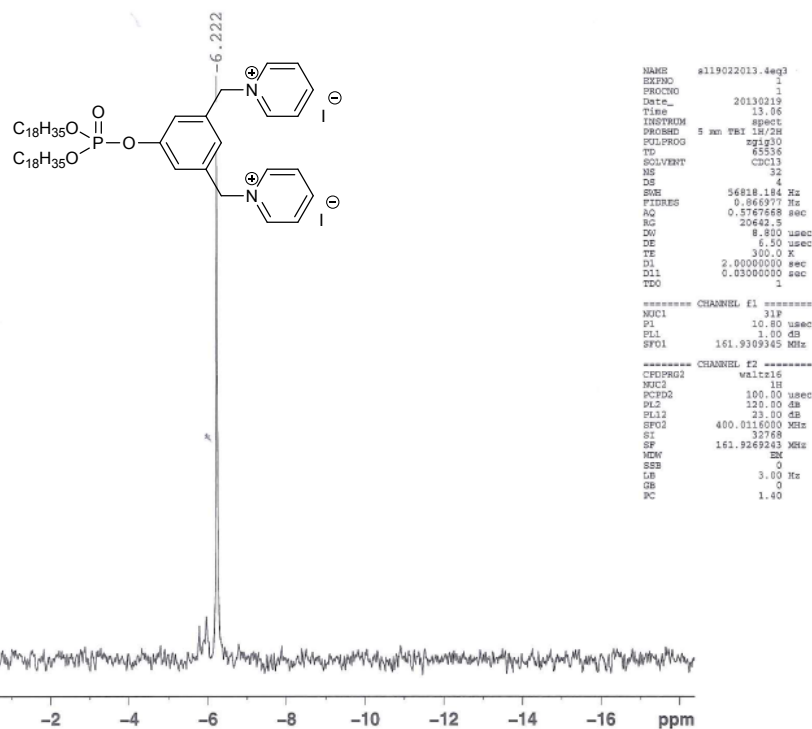**Figure S6-38:**  $^{31}\text{P}$  NMR ( $\text{CDCl}_3$ ) spectrum of compound **19**.

## Supporting materials

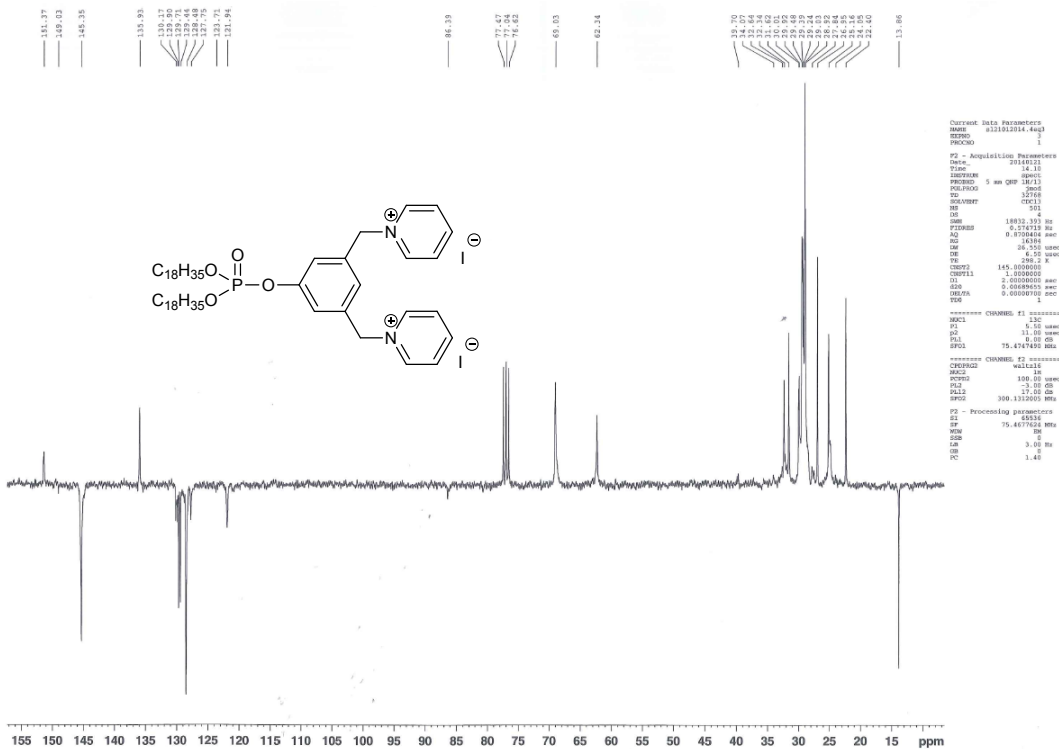

**Figure S6-39:**  $^{13}\text{C}$  jmod ( $\text{CDCl}_3$ ) spectrum of compound **19**.

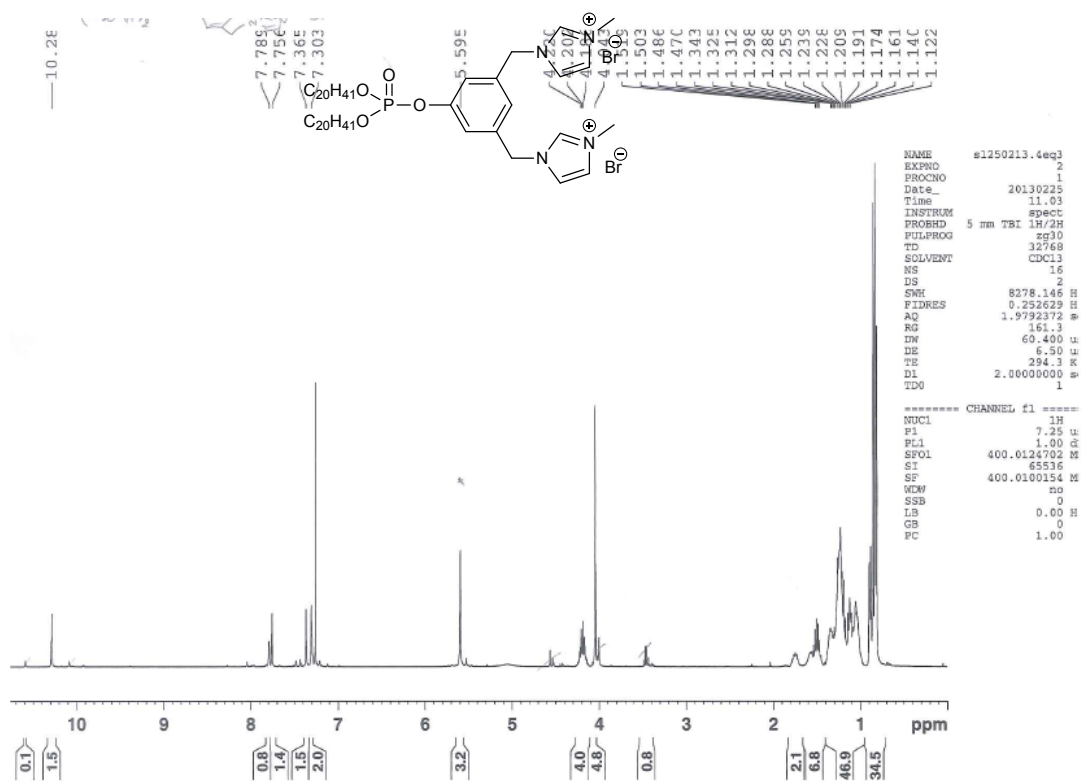Figure S6-40: <sup>1</sup>H NMR (CDCl<sub>3</sub>) spectrum of compound 20.

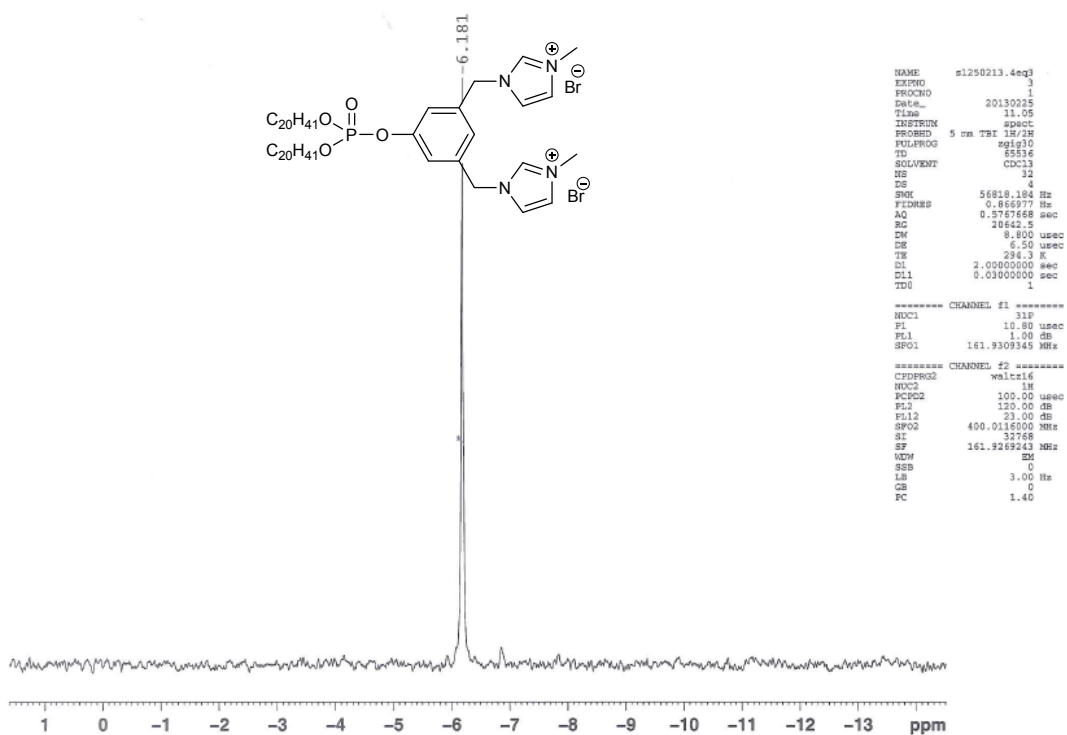

Figure S6-41: <sup>31</sup>P NMR (CDCl<sub>3</sub>) spectrum of compound 20.

## Supporting materials

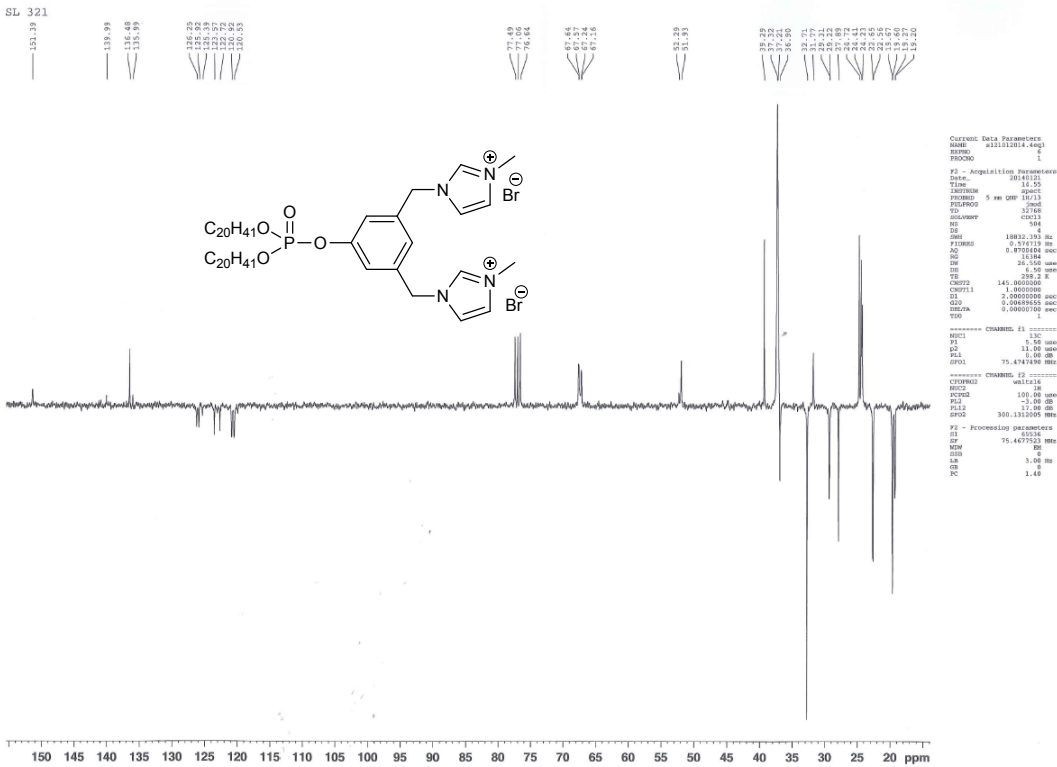

**Figure S6-42:**  $^{13}\text{C}$  jmod ( $\text{CDCl}_3$ ) spectrum of compound **20**.

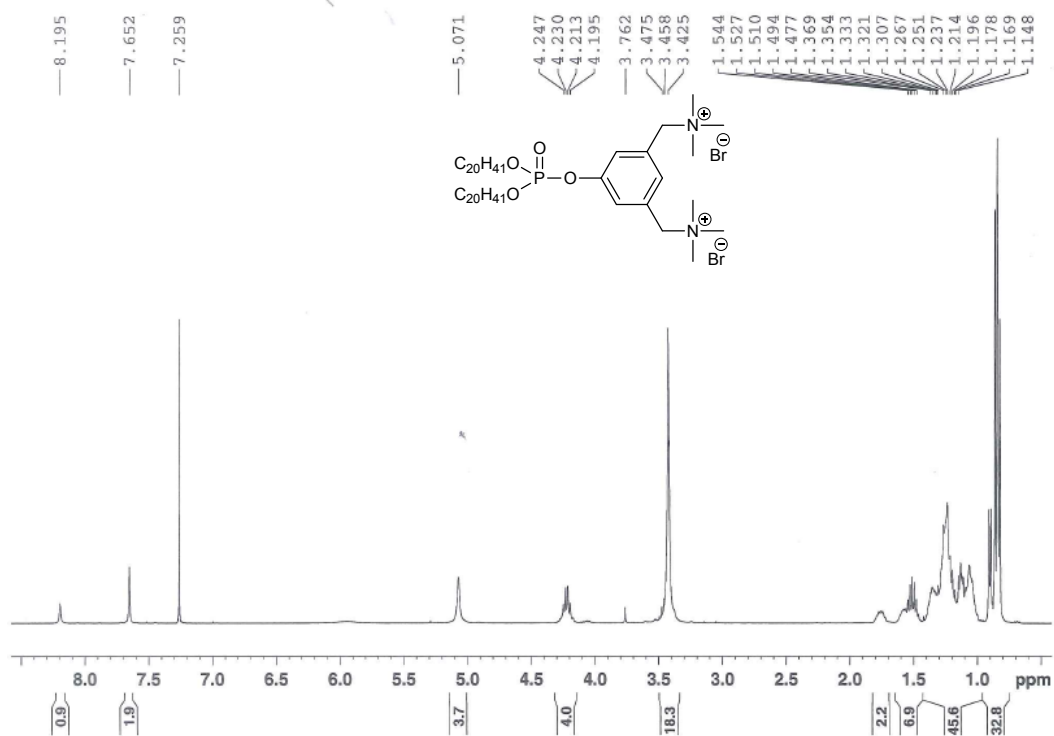

**Figure S6-43:** <sup>1</sup>H NMR (CDCl<sub>3</sub>) spectrum of compound **21**.

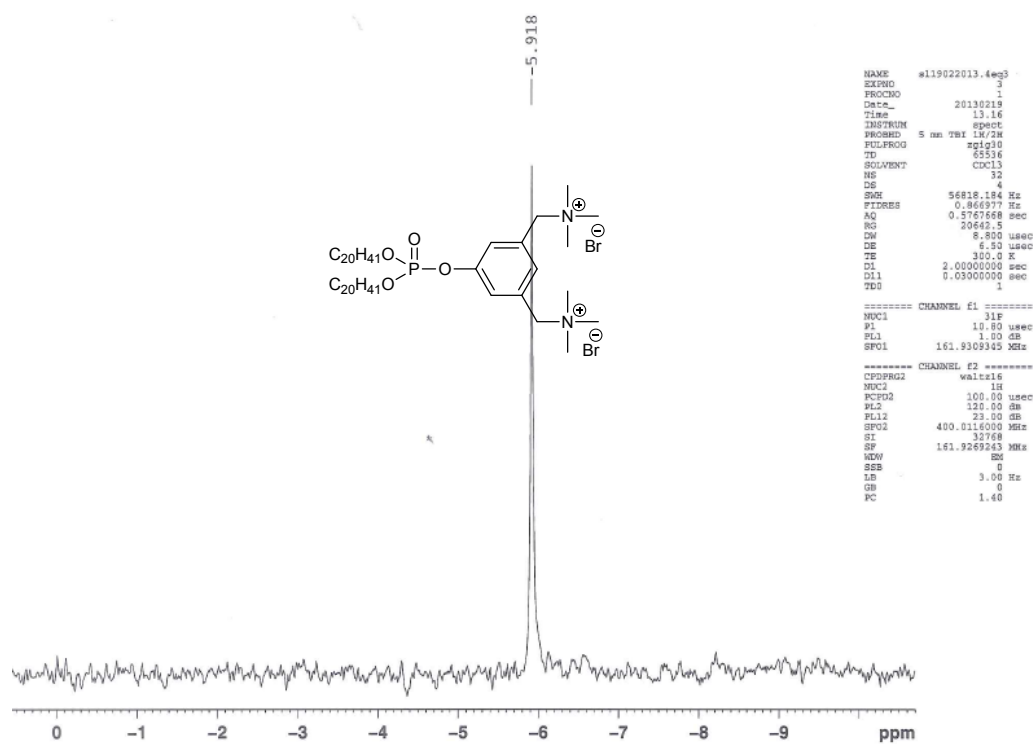

Figure S6-44:  $^{31}\text{P}$  NMR (CDCl<sub>3</sub>) spectrum of compound 21.

## Supporting materials

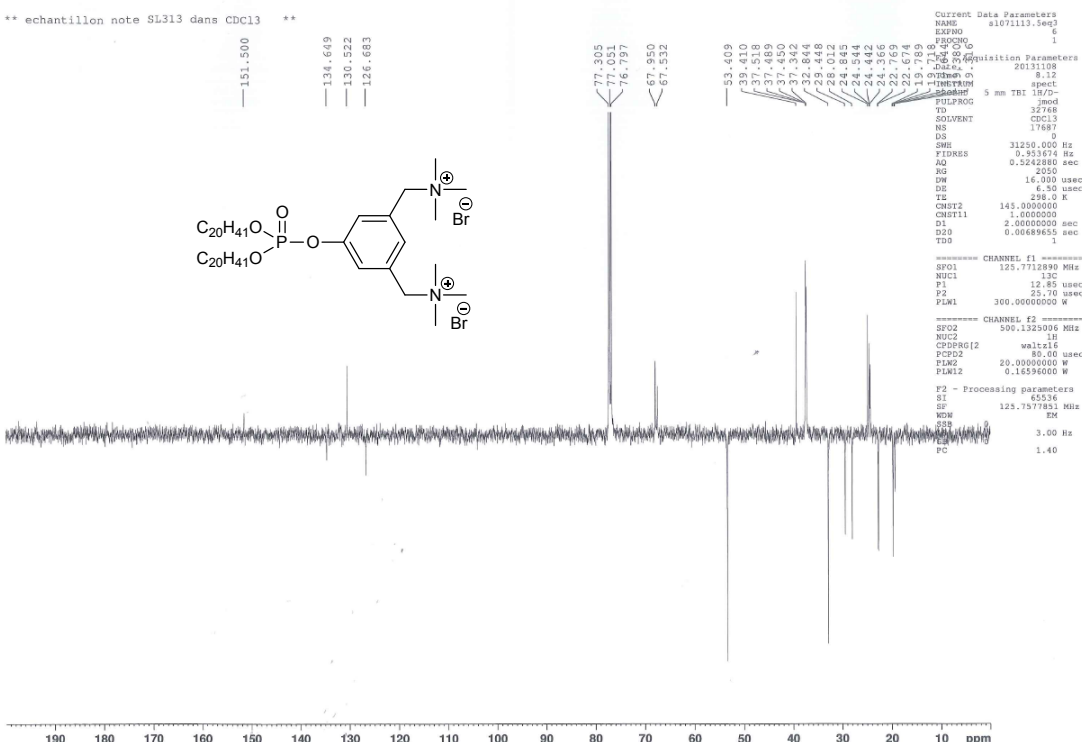

**Figure S6-45:**  $^{13}\text{C}$  jmod ( $\text{CDCl}_3$ ) spectrum of compound **21**.

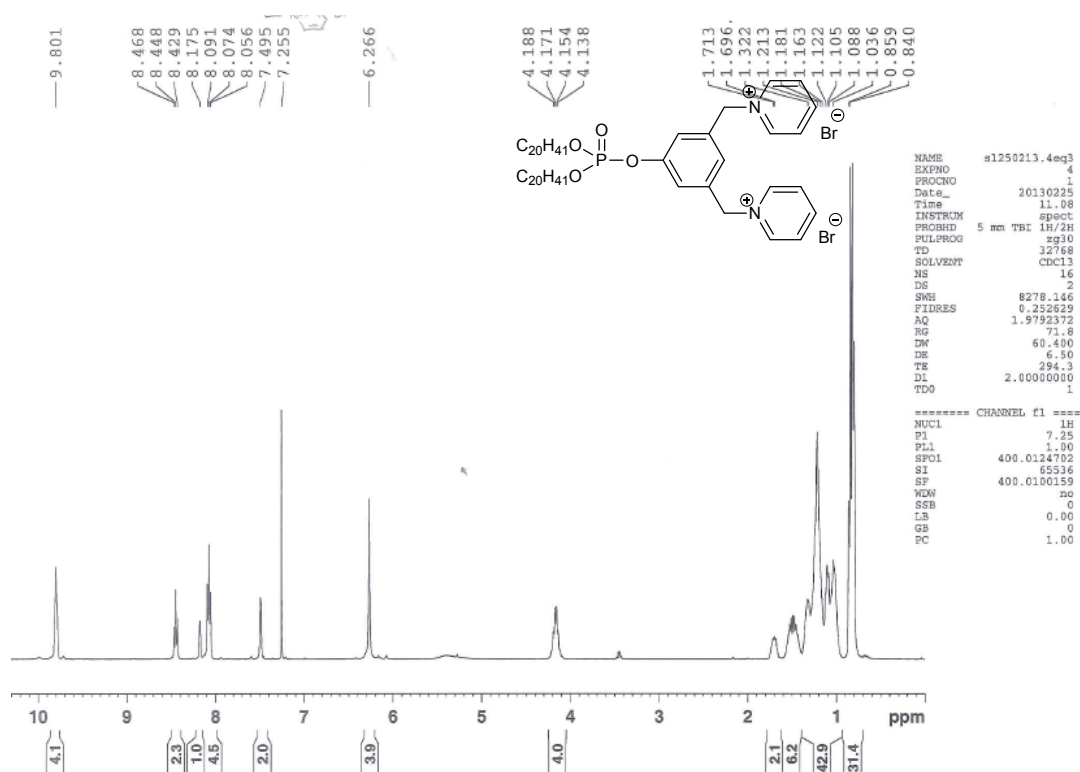

Figure S6-46:  $^1\text{H}$  NMR ( $\text{CDCl}_3$ ) spectrum of compound 22.

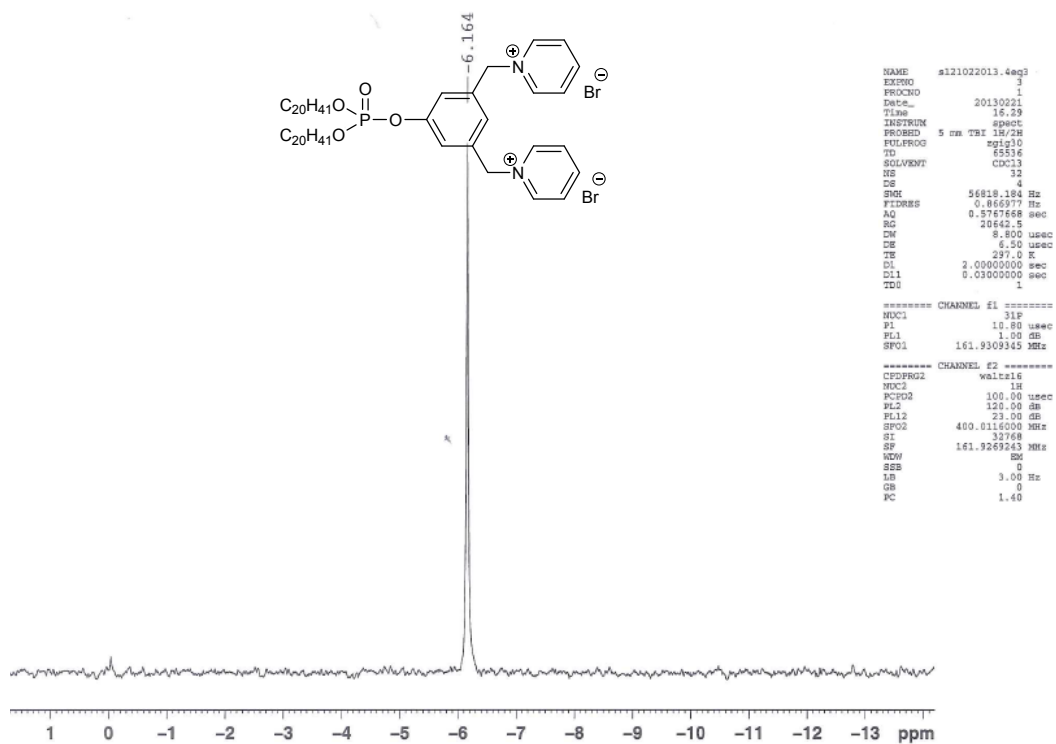Figure S6-47:  $^3\text{P}$  NMR (CDCl<sub>3</sub>) spectrum of compound 22.

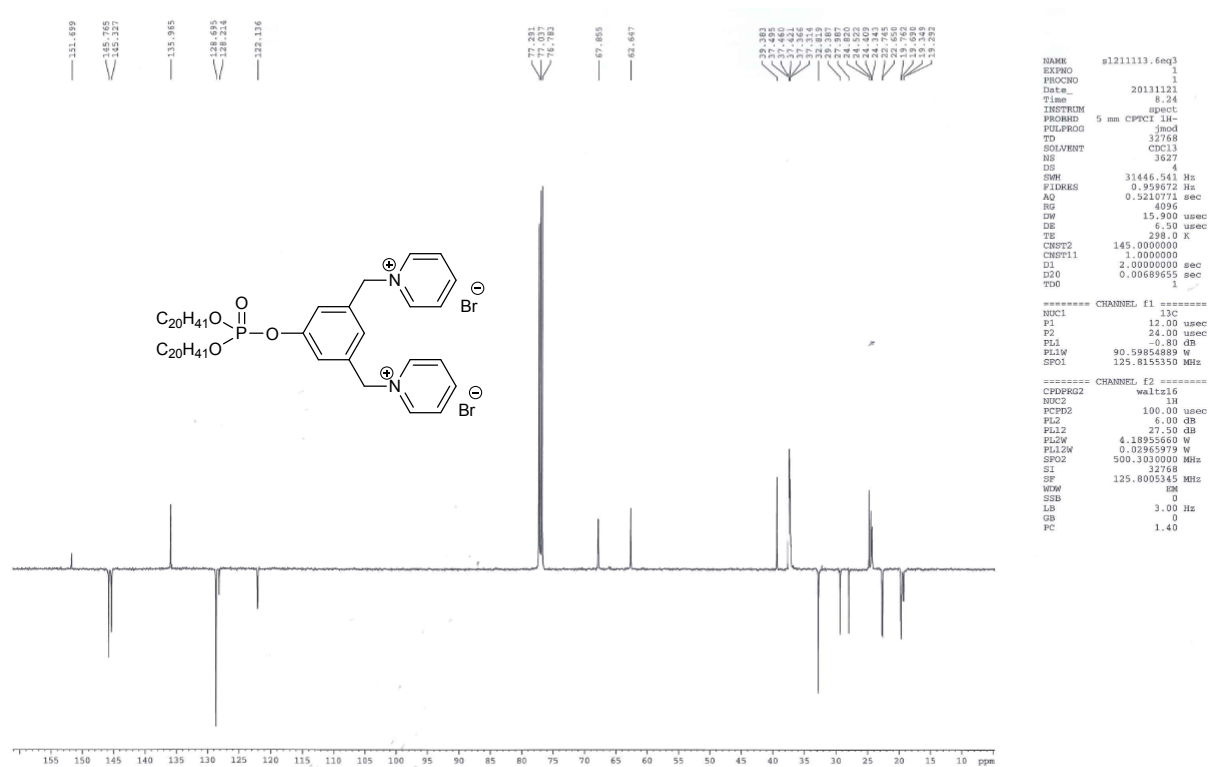

**Figure S6-48:**  $^{13}\text{C}$  jmod ( $\text{CDCl}_3$ ) spectrum of compound **22**.
